# Supplementary material for: Synthesis of novel pyrazolo[3,4-b]quinolinebisphosphonic acids and an unexpected intramolecular cyclization and phosphonylation reaction
Source: Royal Society of Chemistry journal article supplement (doi:10.1039/d1ob00025j), 2021-01-01

## Electronic Supplementary Information for

### Synthesis of novel pyrazolo[3,4-*b*]quinolinebisphosphonic acids and an unexpected intramolecular cyclization and phosphorylation reaction

Fátima C. Teixeira,<sup>\*a</sup> Carla Lucas,<sup>a</sup> M. João M. Curto,<sup>a</sup> Vânia André,<sup>b</sup> M. Teresa Duarte<sup>b</sup> and António P. S. Teixeira<sup>c</sup>

<sup>a</sup> *Laboratório Nacional de Energia e Geologia, I.P., Estrada do Paço do Lumiar, 22, 1649-038 Lisboa, Portugal*

*E-mail: fatima.teixeira@lneg.pt*

<sup>b</sup> *Centro de Química Estrutural, Instituto Superior Técnico, Universidade de Lisboa, Av. Rovisco Pais, 1, 1049-001 Lisboa, Portugal*

<sup>c</sup> *Departamento de Química, Escola de Ciências e Tecnologia & LAQV-REQUIMTE, IIFA, Universidade de Évora, 7000-671 Évora, Portugal*

| Table of Contents                                                                            | Page |
|----------------------------------------------------------------------------------------------|------|
| 1. <sup>1</sup> H, <sup>31</sup> P and <sup>13</sup> C NMR spectra for synthesized compounds | S2   |
| 2. CheckCIF/PLATON report for compound <b>11-I</b>                                           | S21  |
| 3. CheckCIF/PLATON report for compound <b>11-II</b>                                          | S24  |

1.  $^1\text{H}$ ,  $^{31}\text{P}$  and  $^{13}\text{C}$  NMR spectra for synthesized compounds

NMR spectrum of 1H-pyrazolo[3,4-b]quinoline (2)

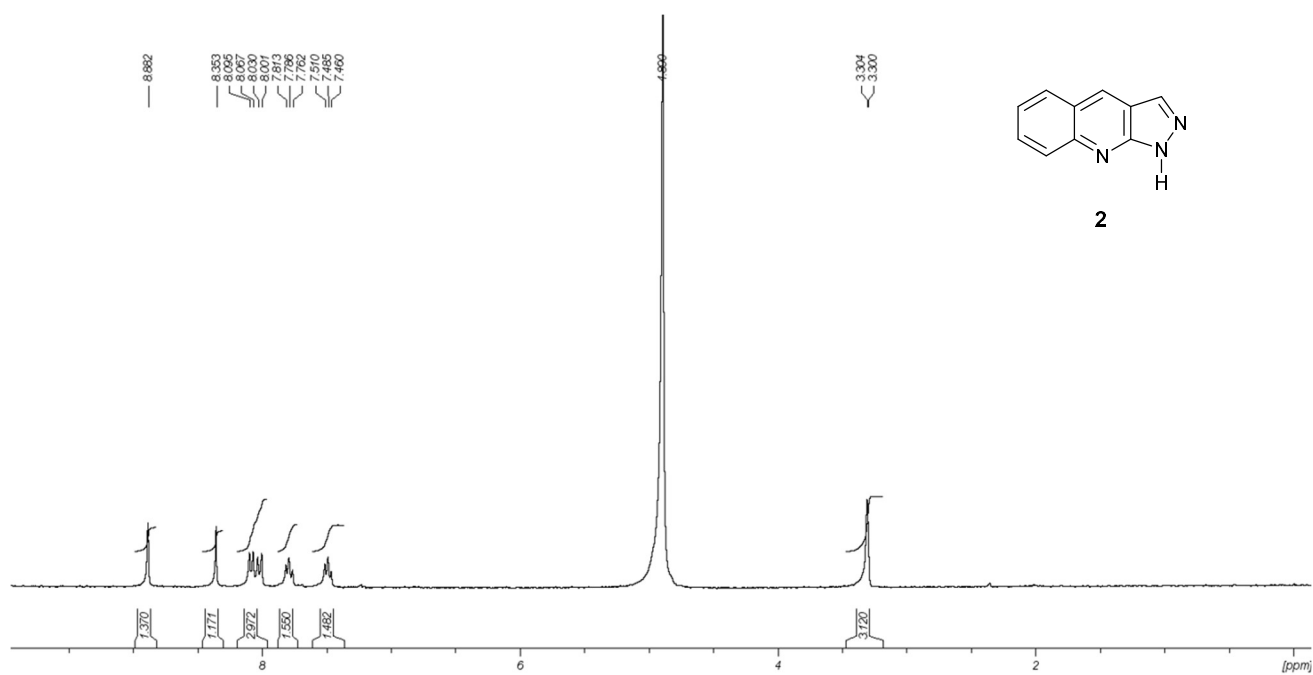

Figure S1.  $^1\text{H}$  NMR spectrum (300 MHz, MeOD) of compound 2.

NMR spectra of ethyl 1*H*-pyrazolo[3,4-*b*]quinolin-1-ylacetate (**3a**)

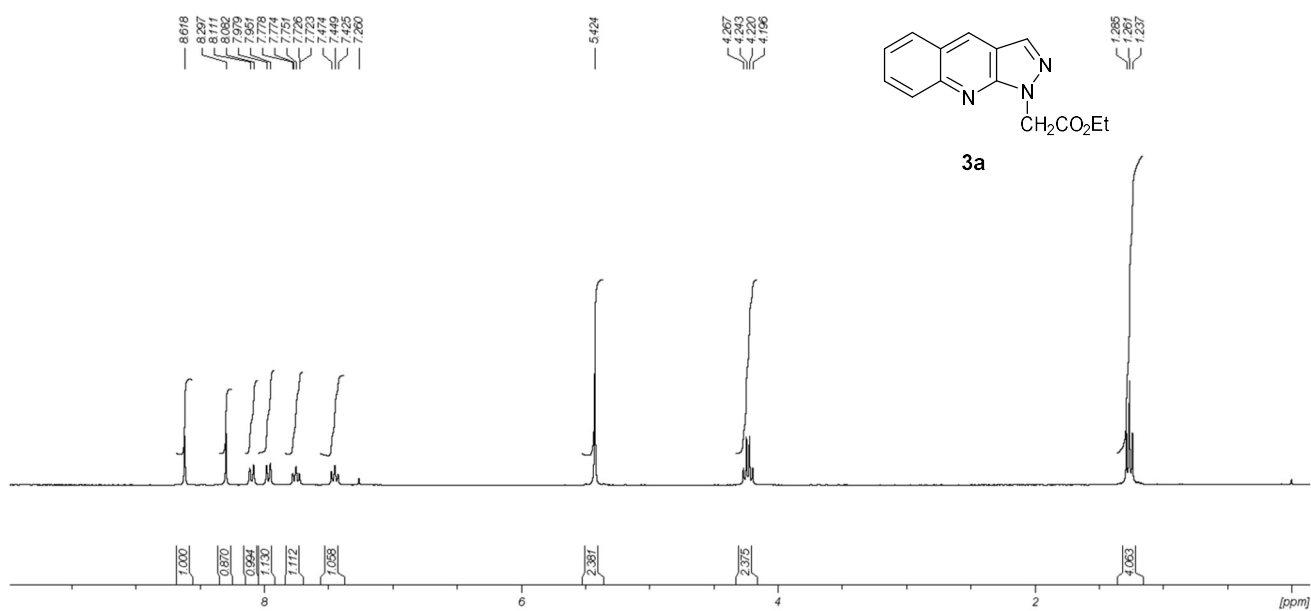

Figure S2. <sup>1</sup>H NMR spectrum (300 MHz, CDCl<sub>3</sub>) of compound **3a**.

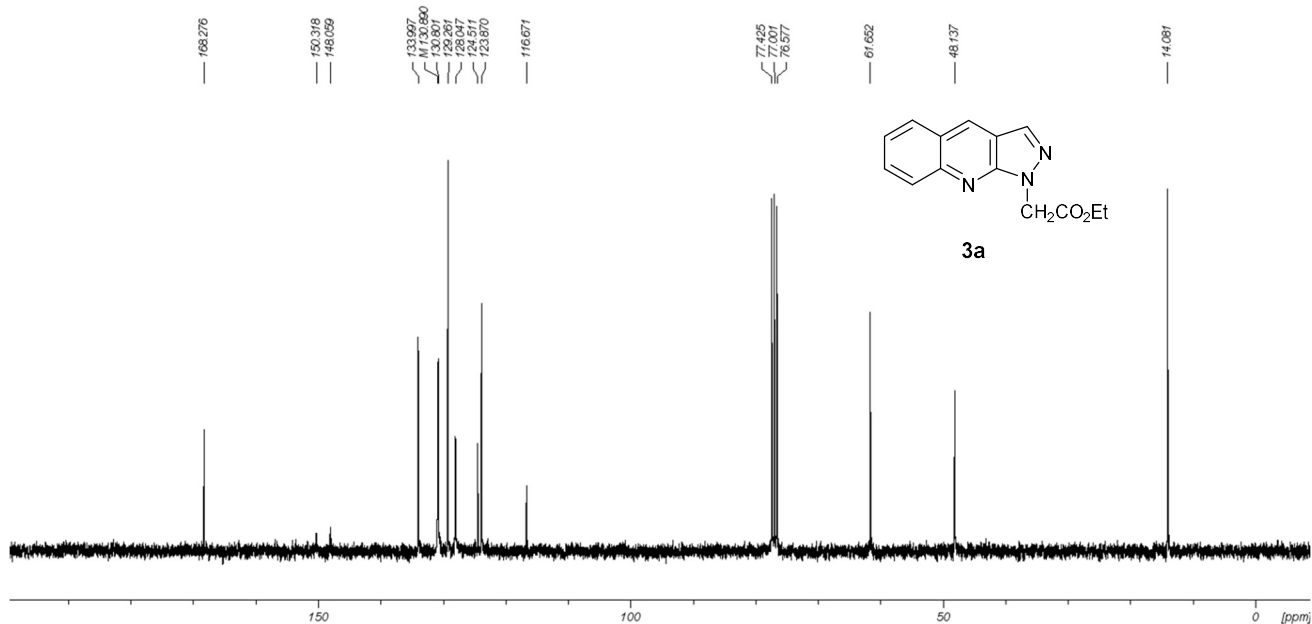

Figure S3. <sup>13</sup>C NMR spectrum (75 MHz, CDCl<sub>3</sub>) of compound **3a**.

NMR spectra of ethyl 3-(1*H*-pyrazolo[3,4-*b*]quinolin-1-yl)propanoate (**3b**)

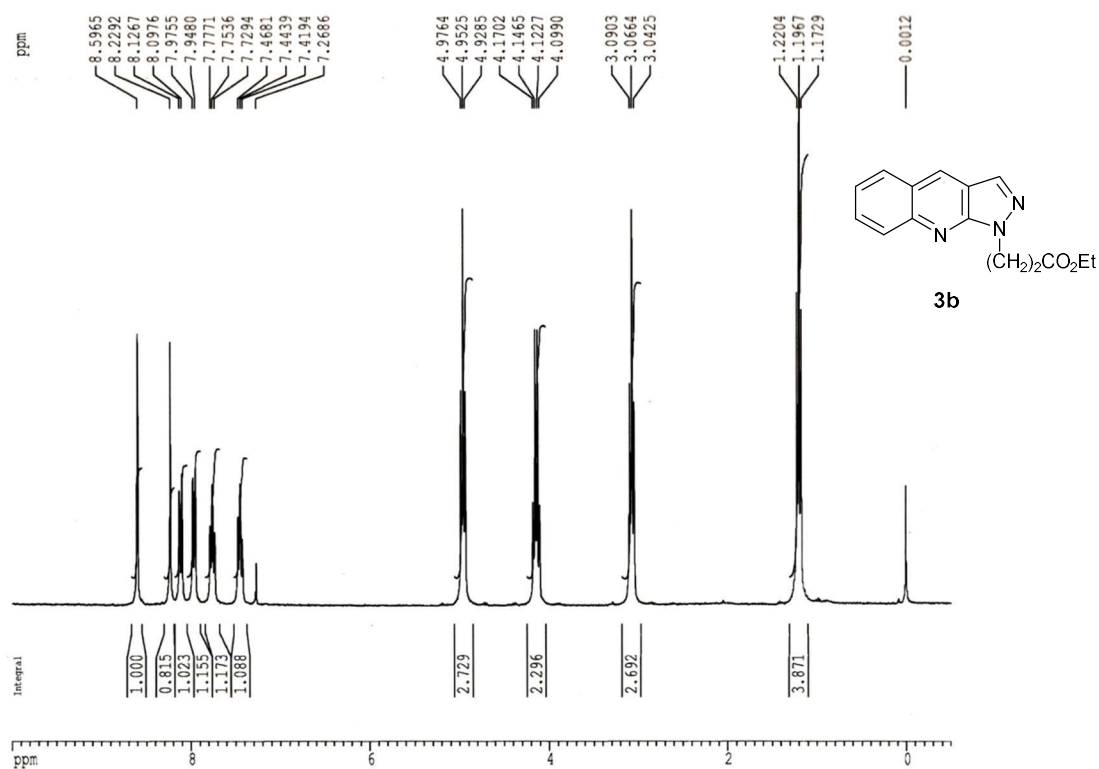

Figure S4. <sup>1</sup>H NMR spectrum (300 MHz, CDCl<sub>3</sub>) of compound **3b**.

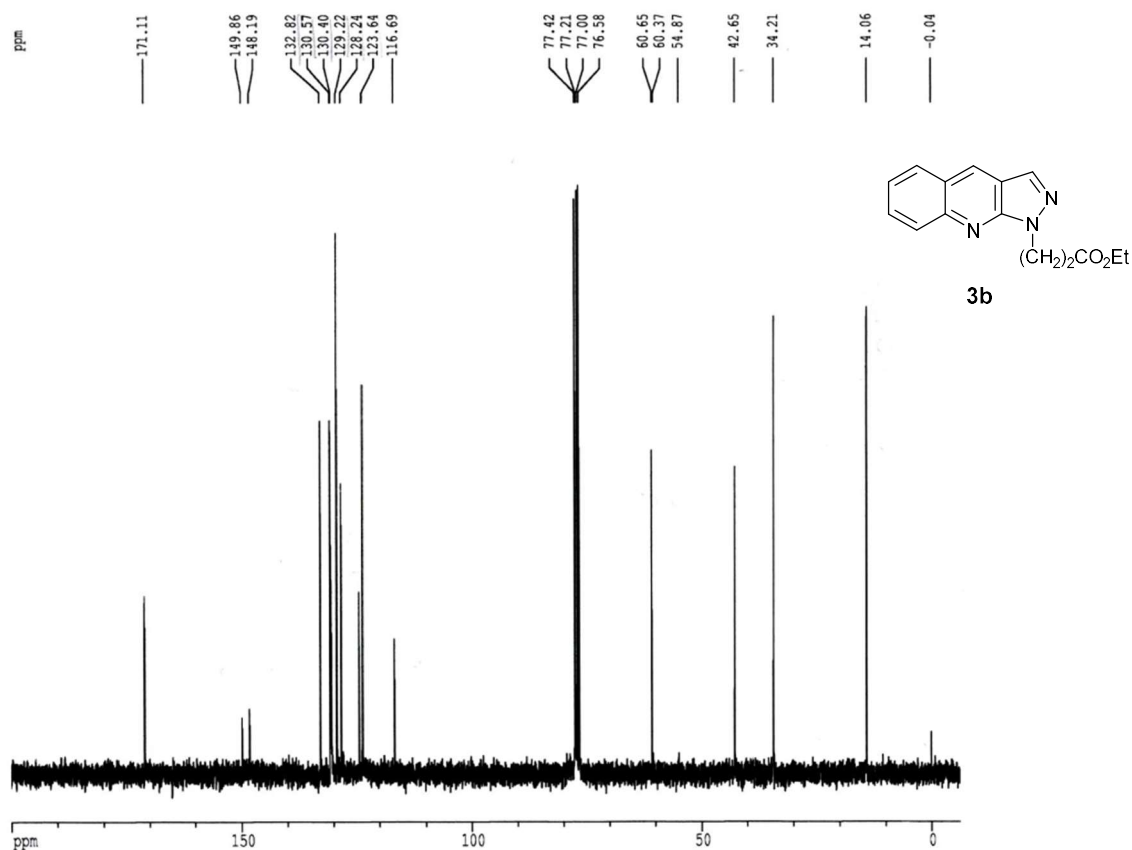

Figure S5. <sup>13</sup>C NMR spectrum (75 MHz, CDCl<sub>3</sub>) of compound **3b**.

NMR spectra of ethyl 3-(2*H*-pyrazolo[3,4-*b*]quinolin-2-yl)propanoate (**4b**)

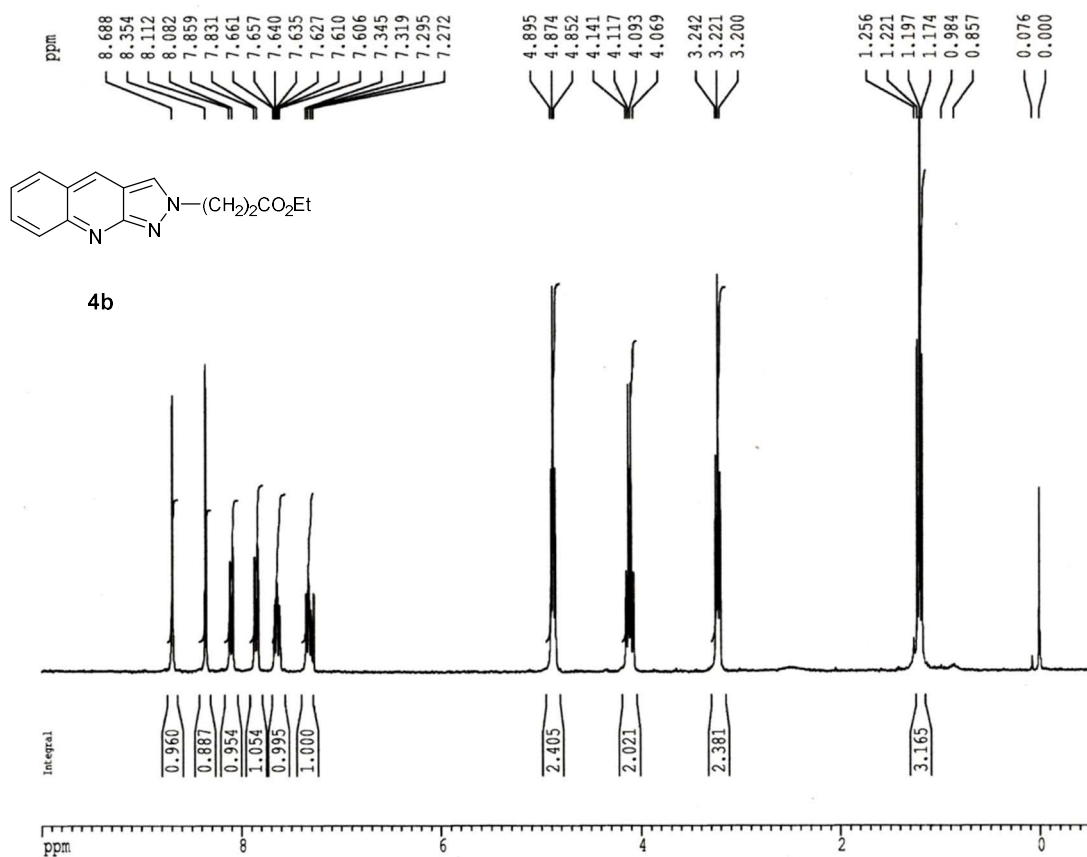

Figure S6. <sup>1</sup>H NMR spectrum (300 MHz, CDCl<sub>3</sub>) of compound **4b**.

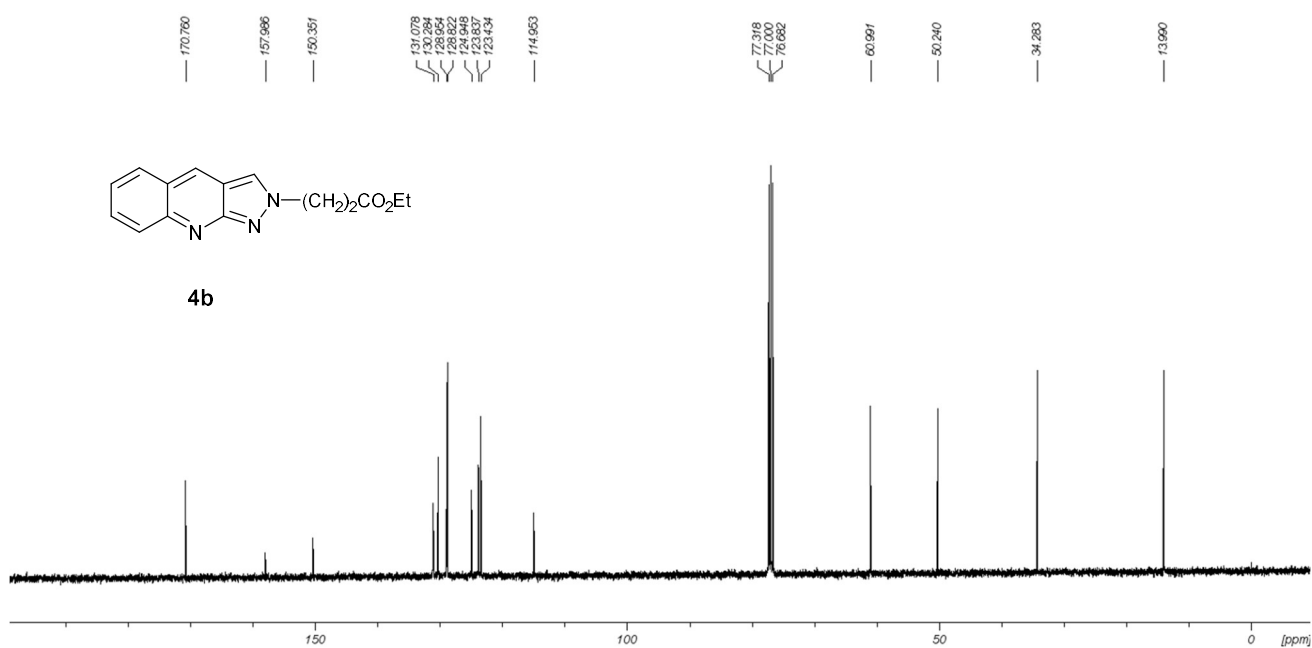

Figure S7. <sup>13</sup>C NMR spectrum (100 MHz, CDCl<sub>3</sub>) of compound **4b**.

NMR spectra of ethyl 4-(1*H*-pyrazolo[3,4-*b*]quinolin-1-yl)butanoate (**3c**)

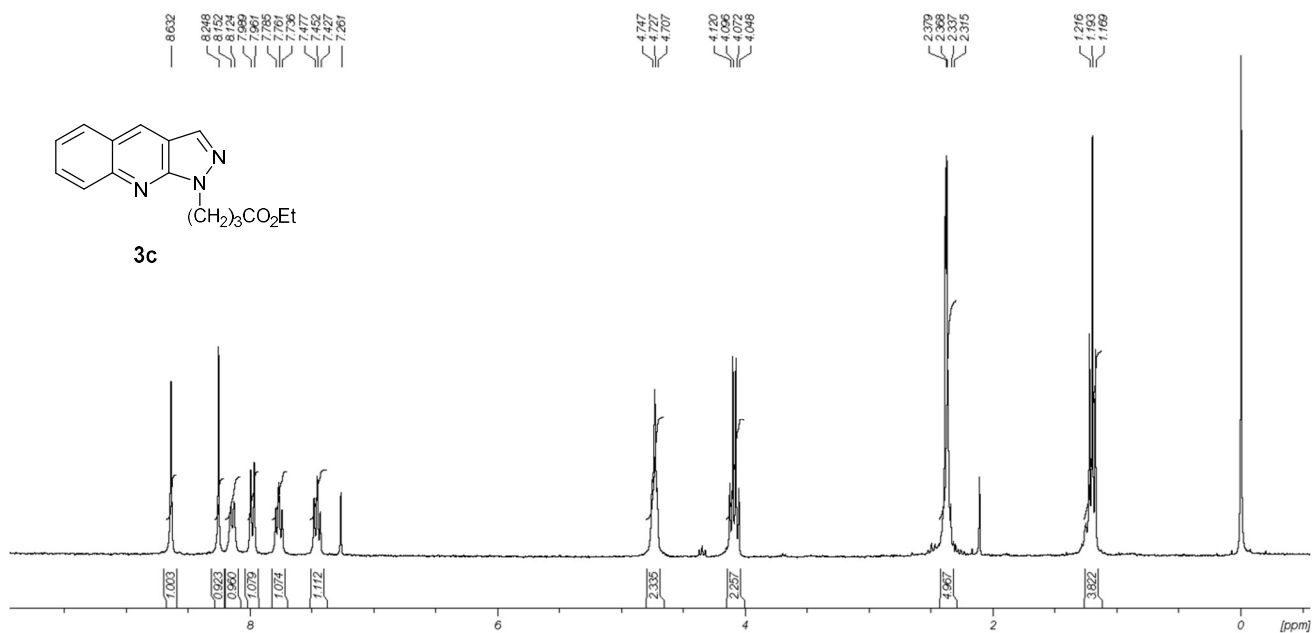

Figure S8. <sup>1</sup>H NMR spectrum (300 MHz, CDCl<sub>3</sub>) of compound **3c**.

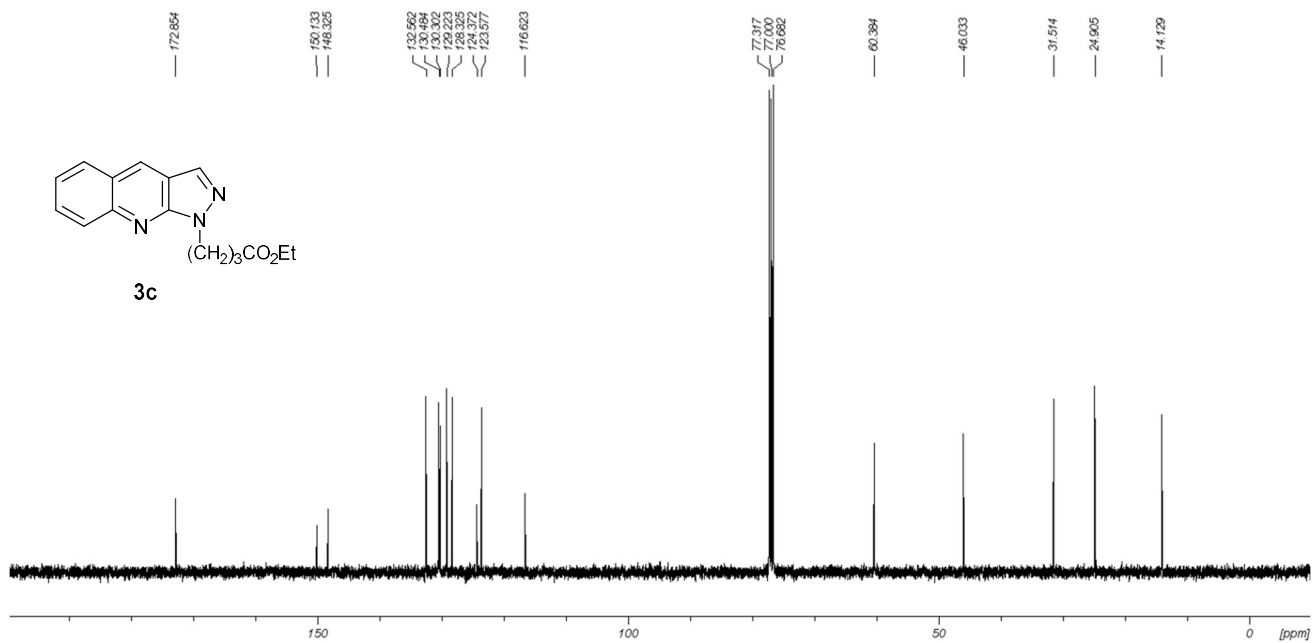

Figure S9. <sup>13</sup>C NMR spectrum (100 MHz, CDCl<sub>3</sub>) of compound **3c**.

NMR spectra of 1H-pyrazolo[3,4-b]quinolin-1-ylacetic acid (5a)

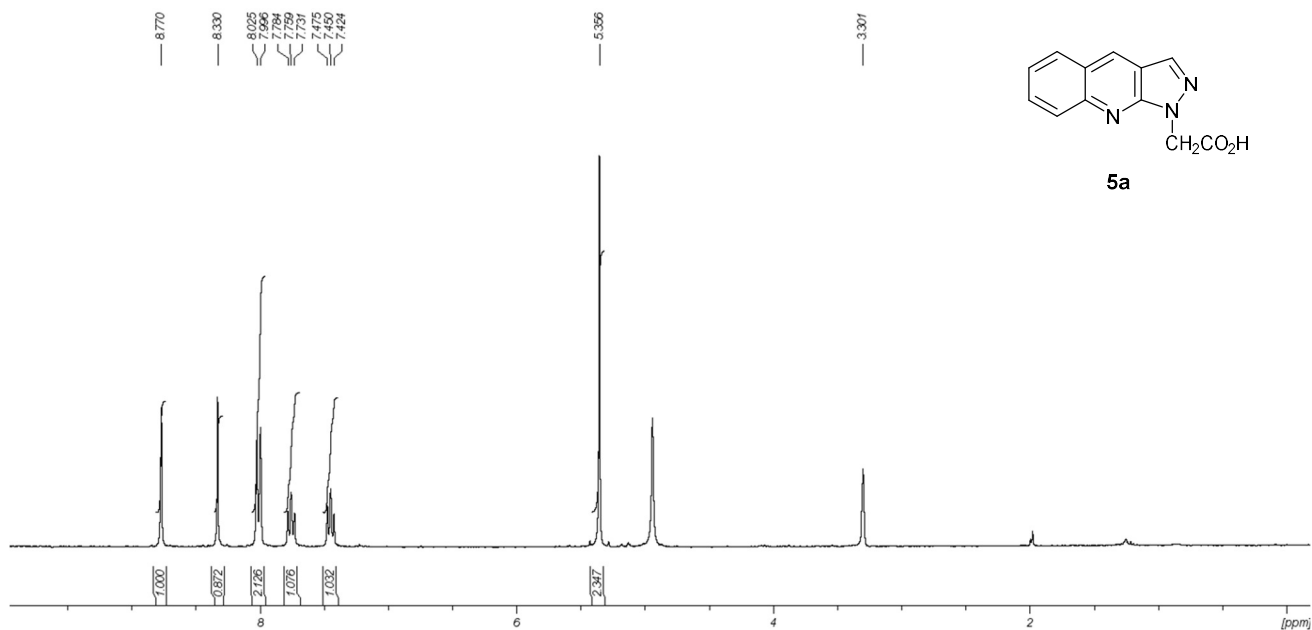

Figure S10. <sup>1</sup>H NMR spectrum (300 MHz, MeOD) of compound 5a.

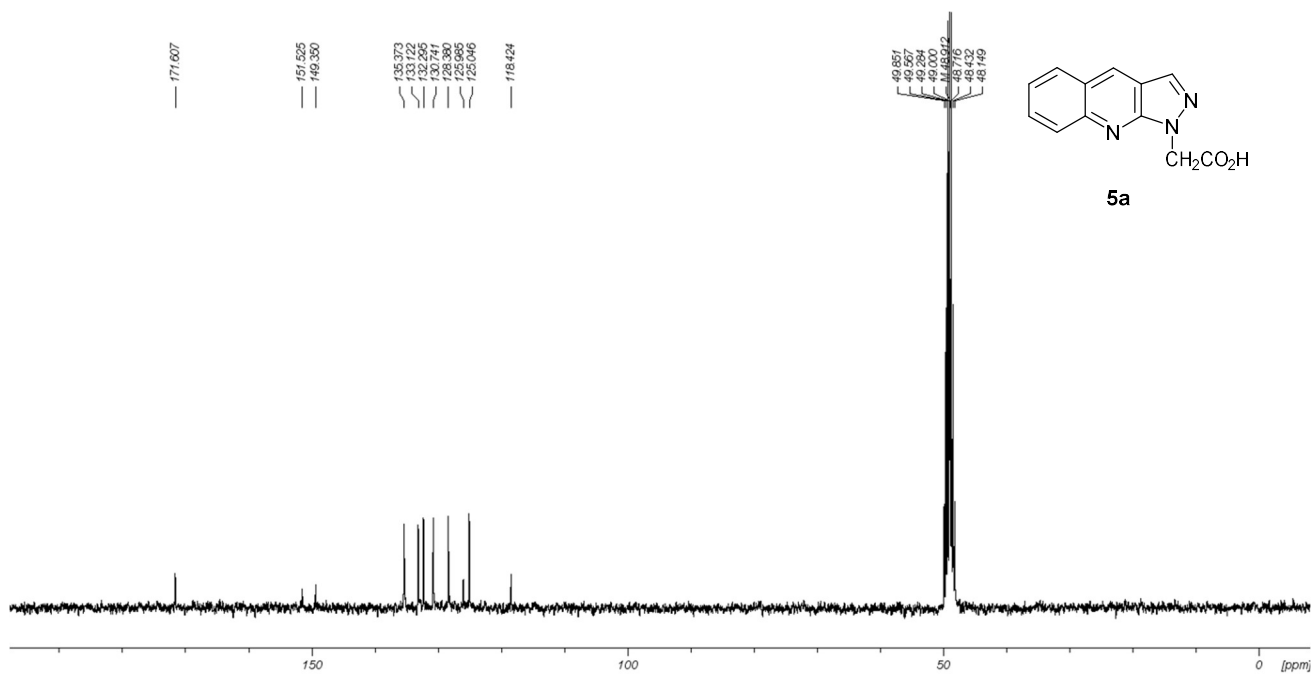

Figure S11. <sup>13</sup>C NMR spectrum (75 MHz, MeOD) of compound 5a.

NMR spectra of 3-1*H*-pyrazolo[3,4-*b*]quinolin-1-ylpropionic acid (**5b**)

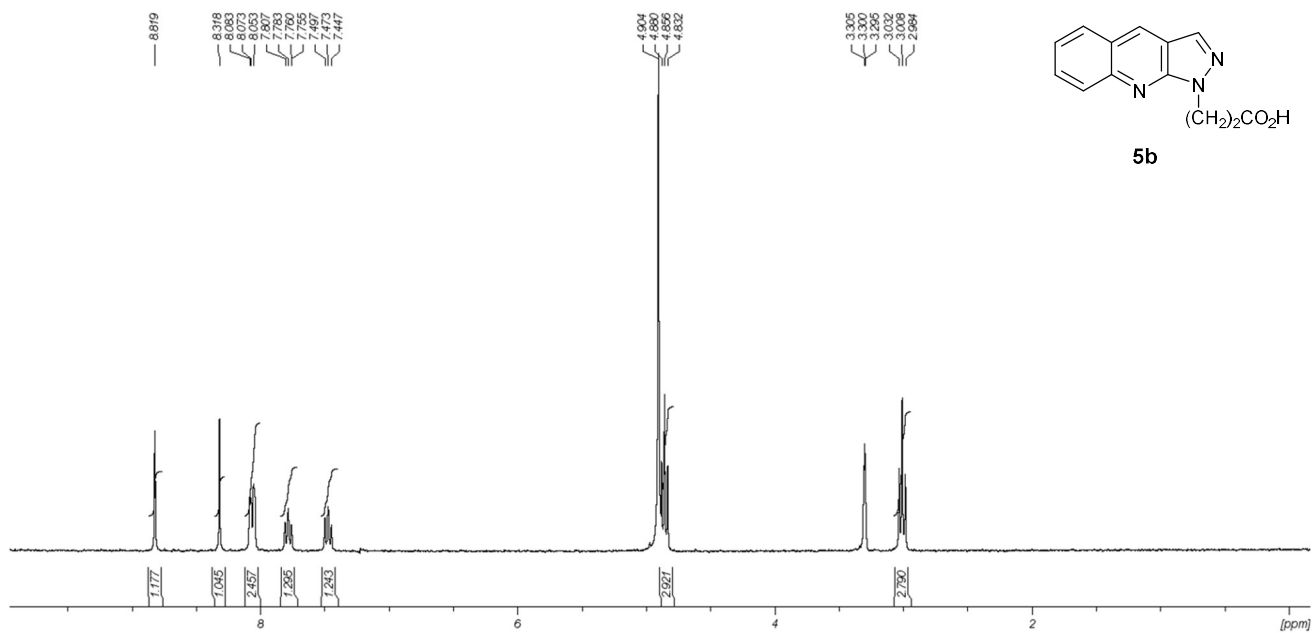

Figure S12. <sup>1</sup>H NMR spectrum (300 MHz, MeOD) of compound **5b**.

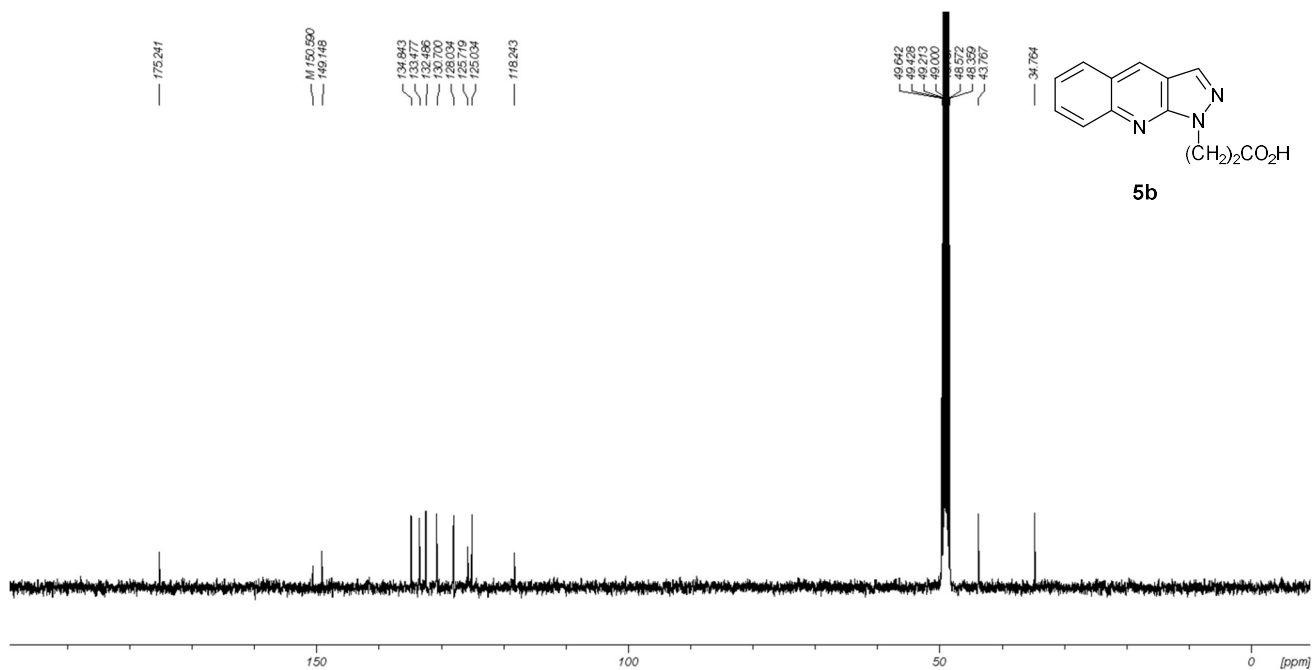

Figure S13. <sup>13</sup>C NMR spectrum (100 MHz, MeOD) of compound **5b**.



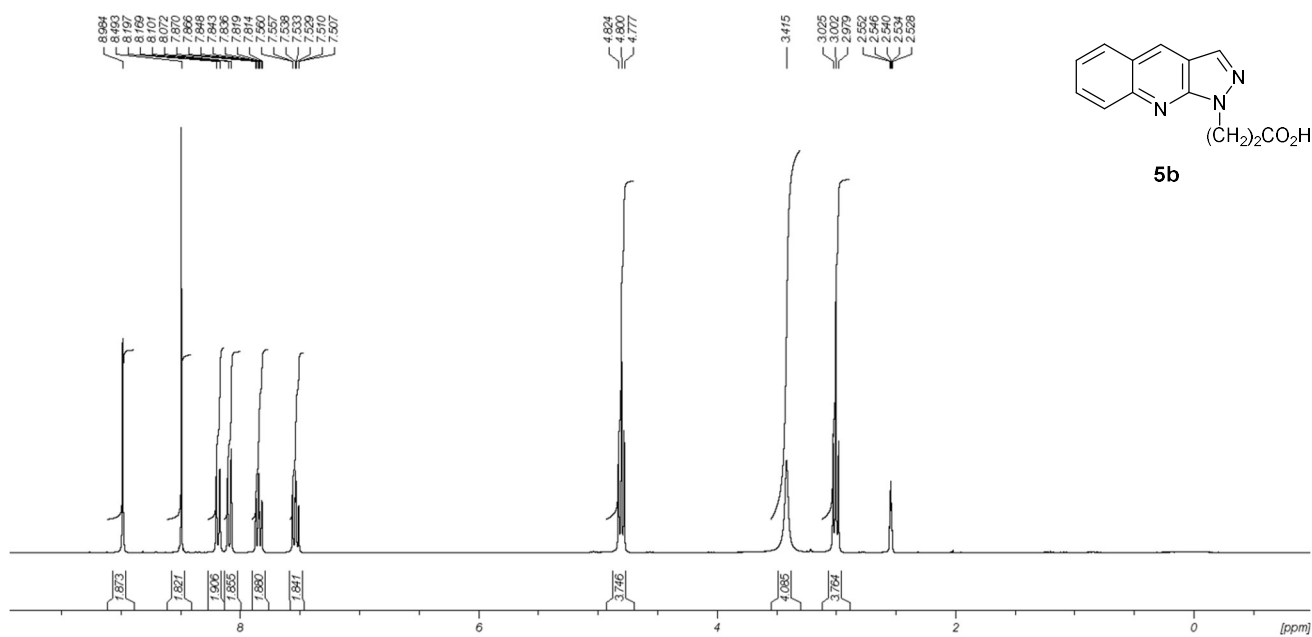

**Figure S14.** <sup>1</sup>H NMR spectrum (300 MHz, DMSO-*d*<sub>6</sub>) of compound **5b**.

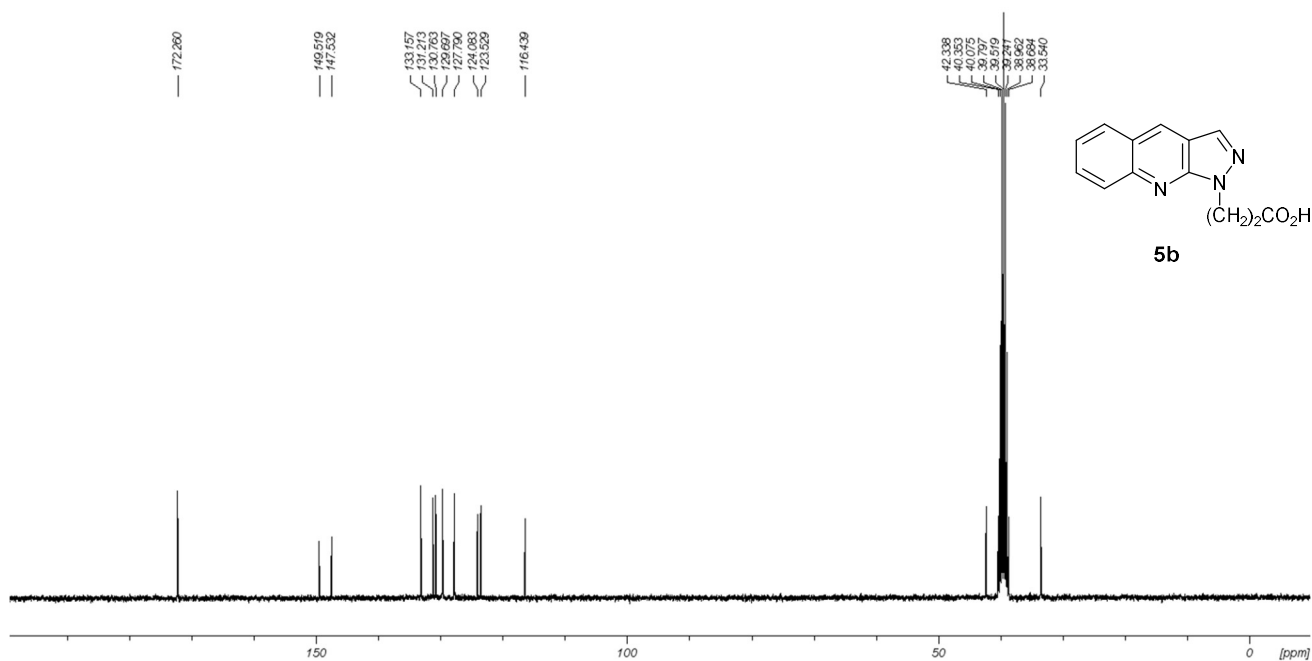

**Figure S15.** <sup>13</sup>C NMR spectrum (75 MHz, DMSO-*d*<sub>6</sub>) of compound **5b**.

NMR spectra of 4-1*H*-pyrazolo[3,4-*b*]quinolin-1-ylbutyric acid (**5c**)

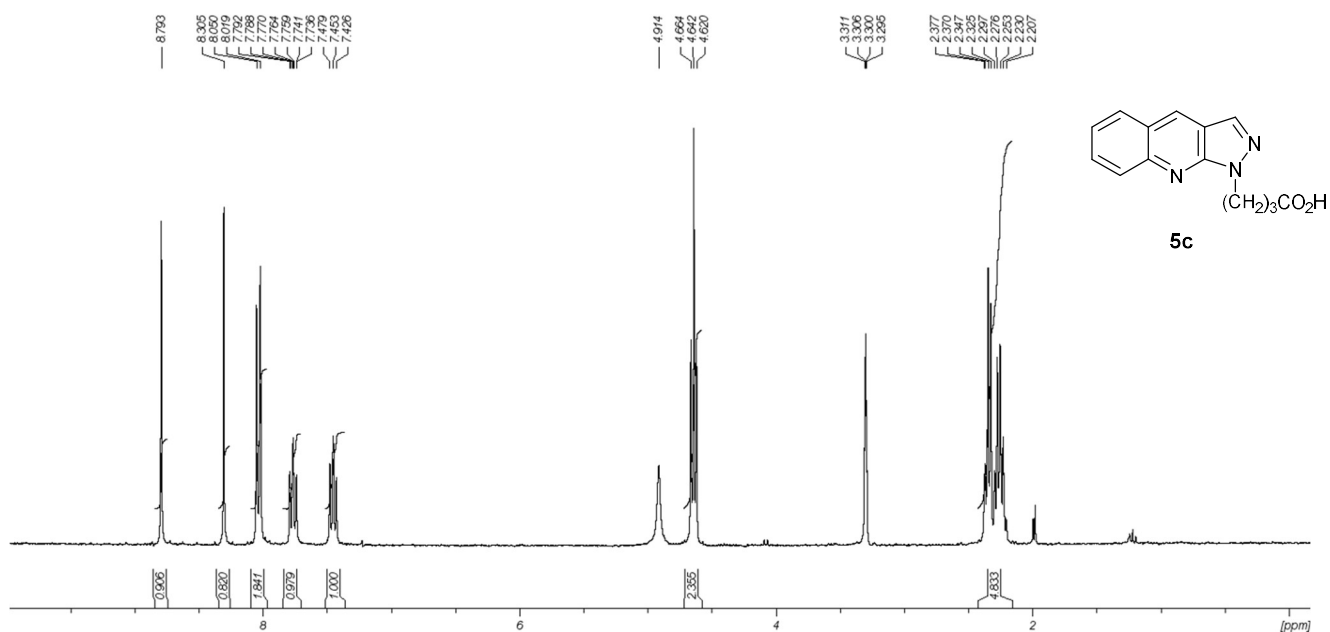

Figure S16. <sup>1</sup>H NMR spectrum (300 MHz, MeOD) of compound **5c**.

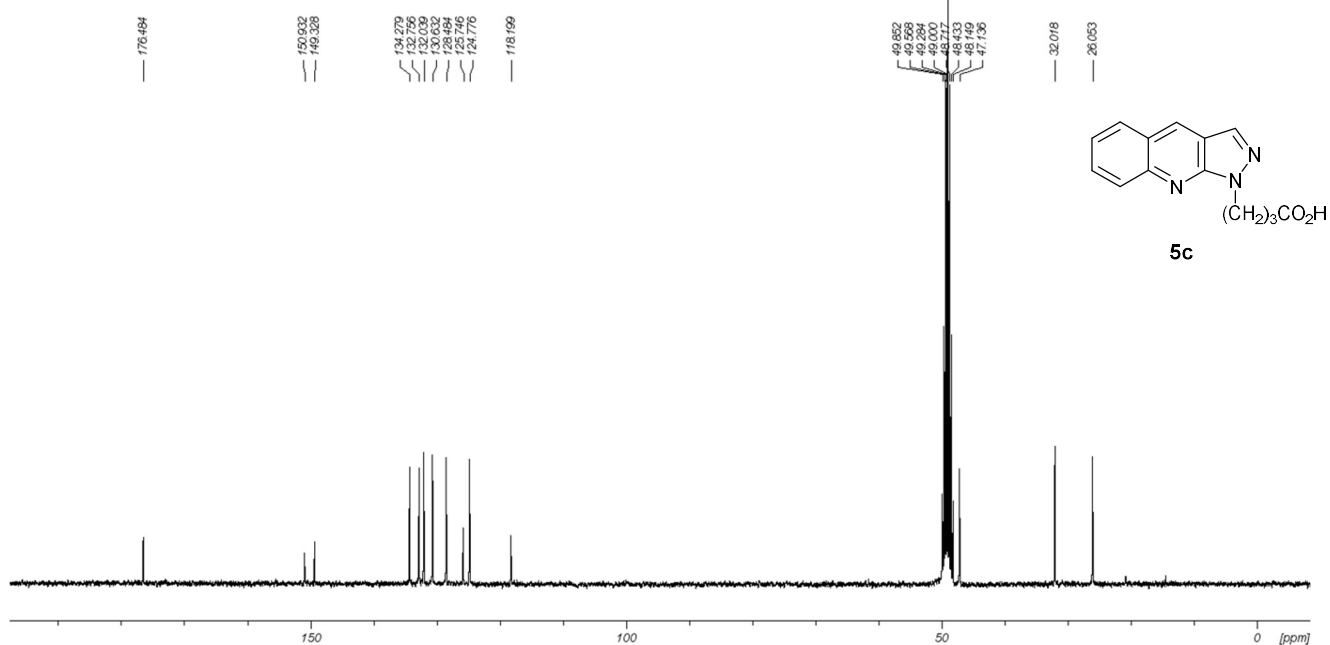

Figure S17. <sup>13</sup>C NMR spectrum (75 MHz, MeOD) of compound **5c**.

NMR spectra of 1*H*-pyrazolo[3,4-*b*]quinolin-1-yl)acetylphosphonic acid (**9**)

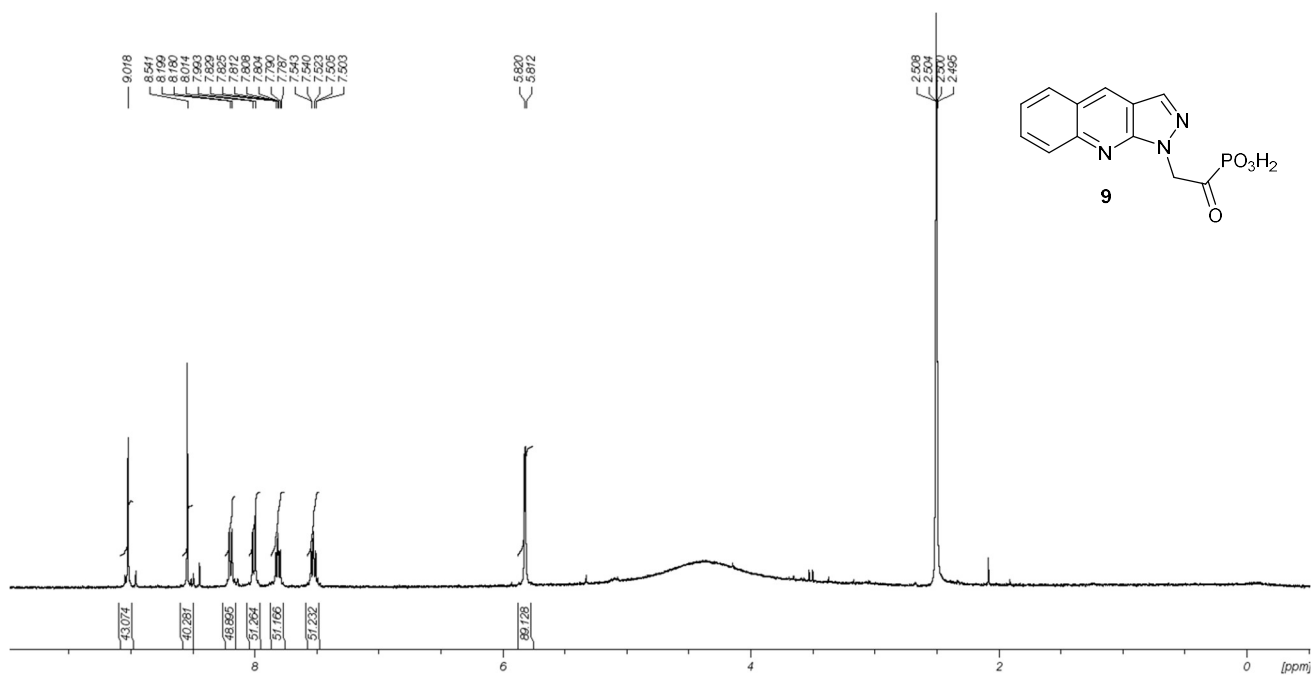

**Figure S18.** <sup>1</sup>H NMR spectrum (400 MHz, DMSO-*d*<sub>6</sub>) of compound **9**.

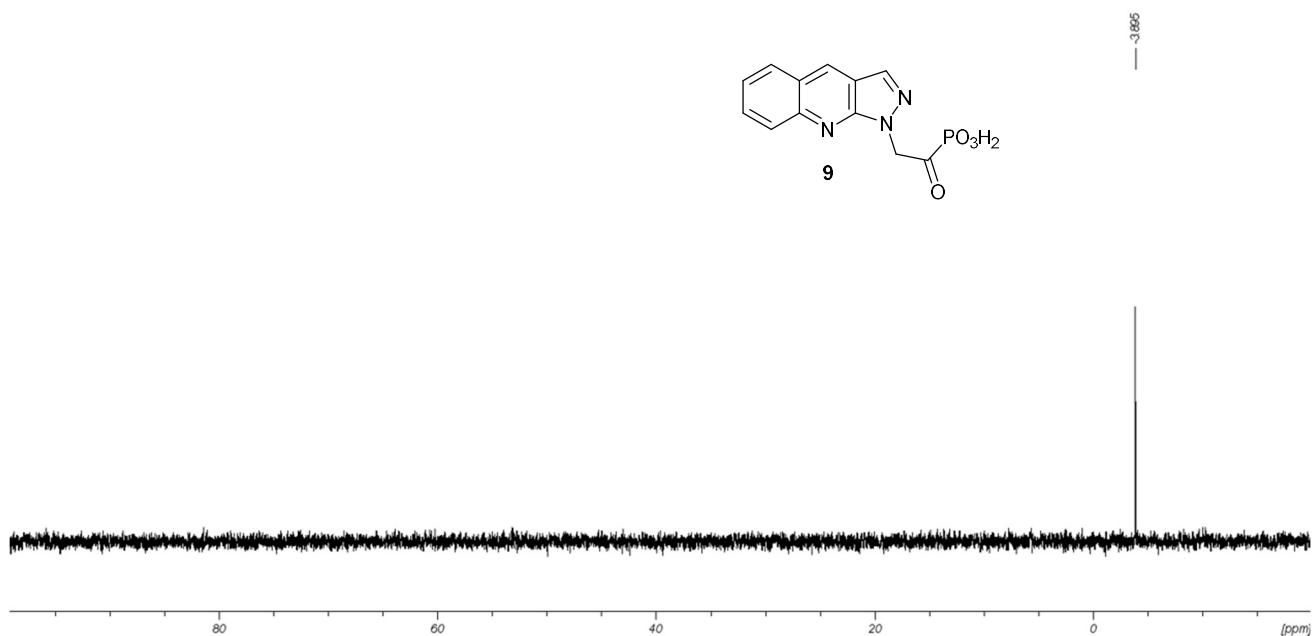

**Figure S19.** <sup>31</sup>P NMR spectrum (162 MHz, DMSO-*d*<sub>6</sub>) of compound **9**.

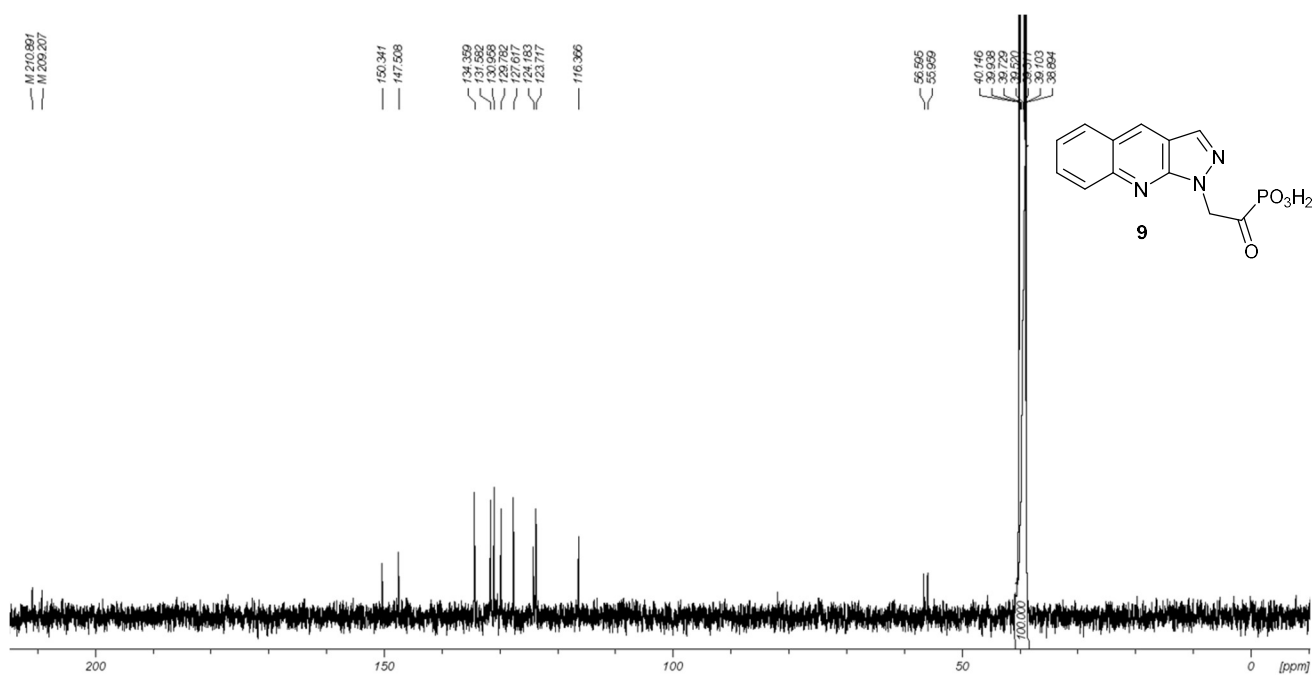

Figure S20. <sup>13</sup>C NMR spectrum (100 MHz, DMSO-*d*<sub>6</sub>) of compound 9.

NMR spectra of [1-hydroxy-2-(1*H*-pyrazolo[3,4-*b*]quinolin-1-yl)ethane-1,1-diyl]bis(phosphonic acid) (6)

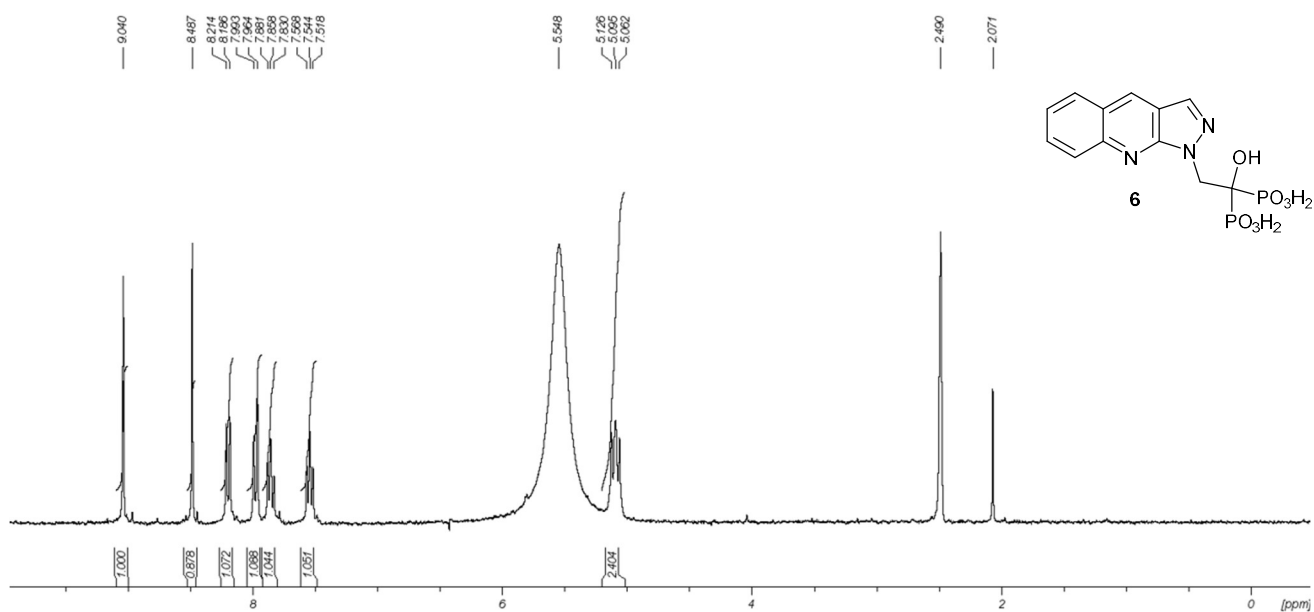

Figure S21. <sup>1</sup>H NMR spectrum (300 MHz, DMSO-*d*<sub>6</sub>) of compound 6.

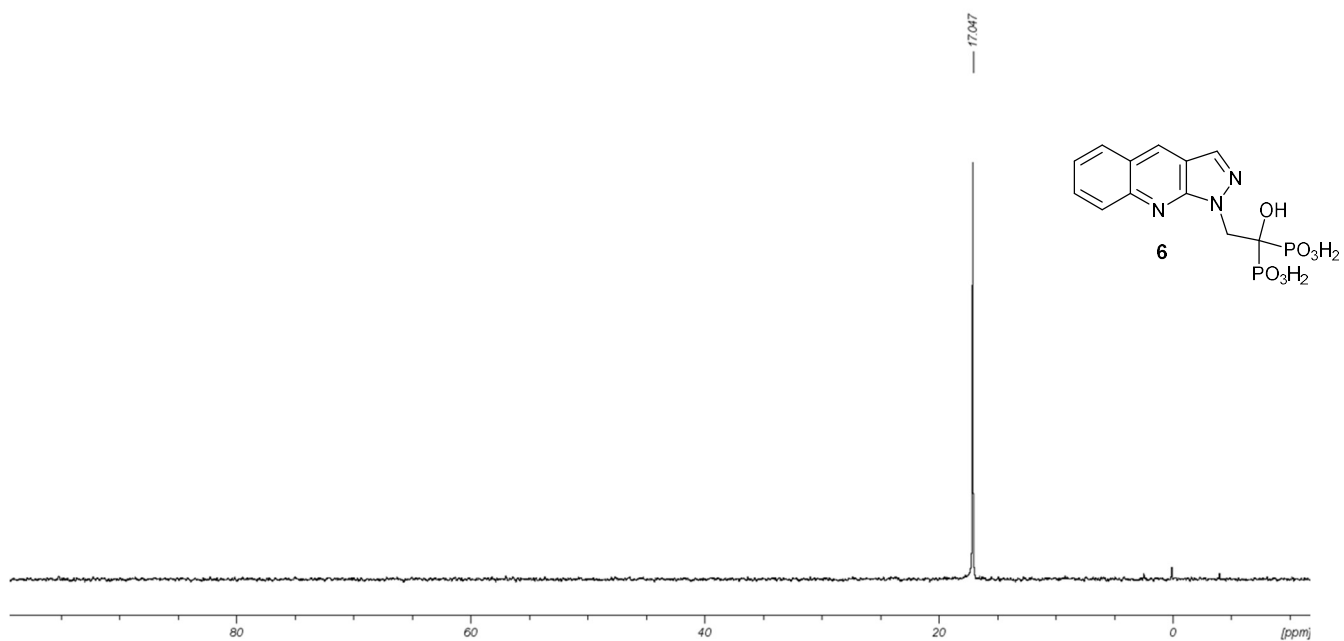

**Figure S22.** <sup>31</sup>P NMR spectrum (121 MHz, DMSO-*d*<sub>6</sub>) of compound 6.

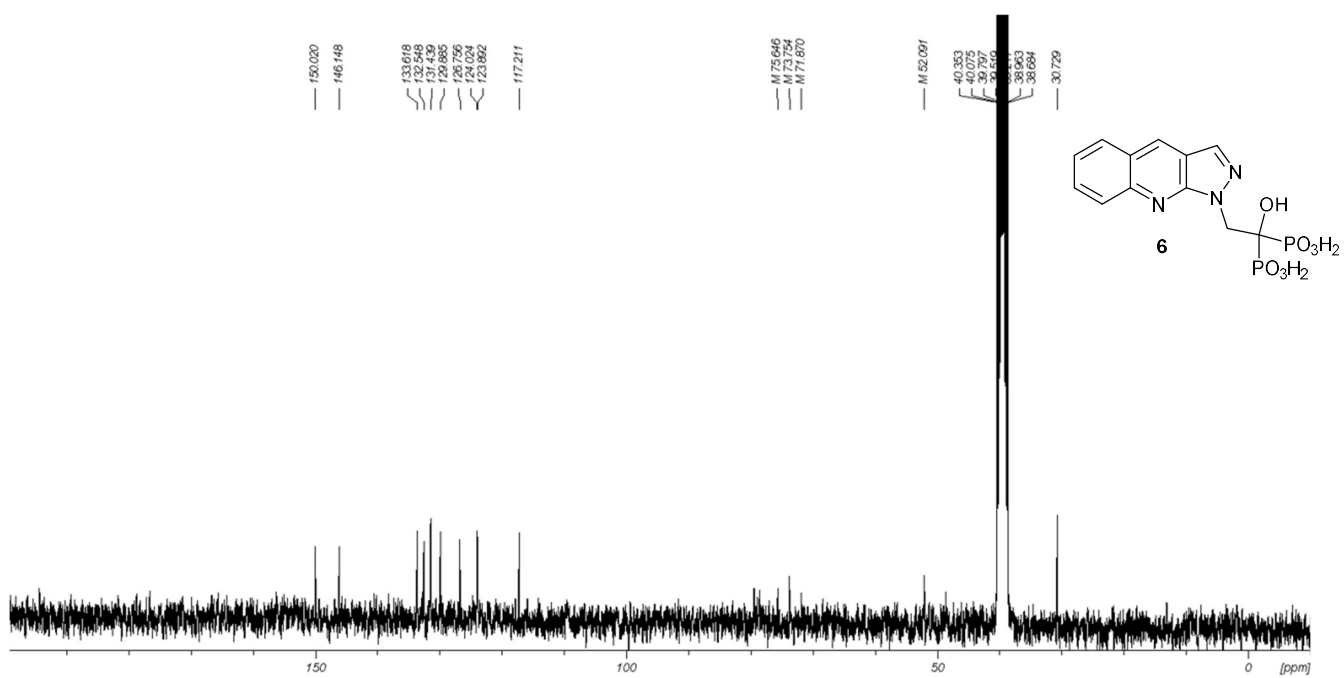

**Figure S23.** <sup>13</sup>C NMR spectrum (75 MHz, DMSO-*d*<sub>6</sub>) of [compound 6].

**NMR spectra of [1-hydroxy-4-(1*H*-pyrazolo[3,4-*b*]quinolin-1-yl)butane-1,1-diyl]bis(phosphonic acid) (8)**

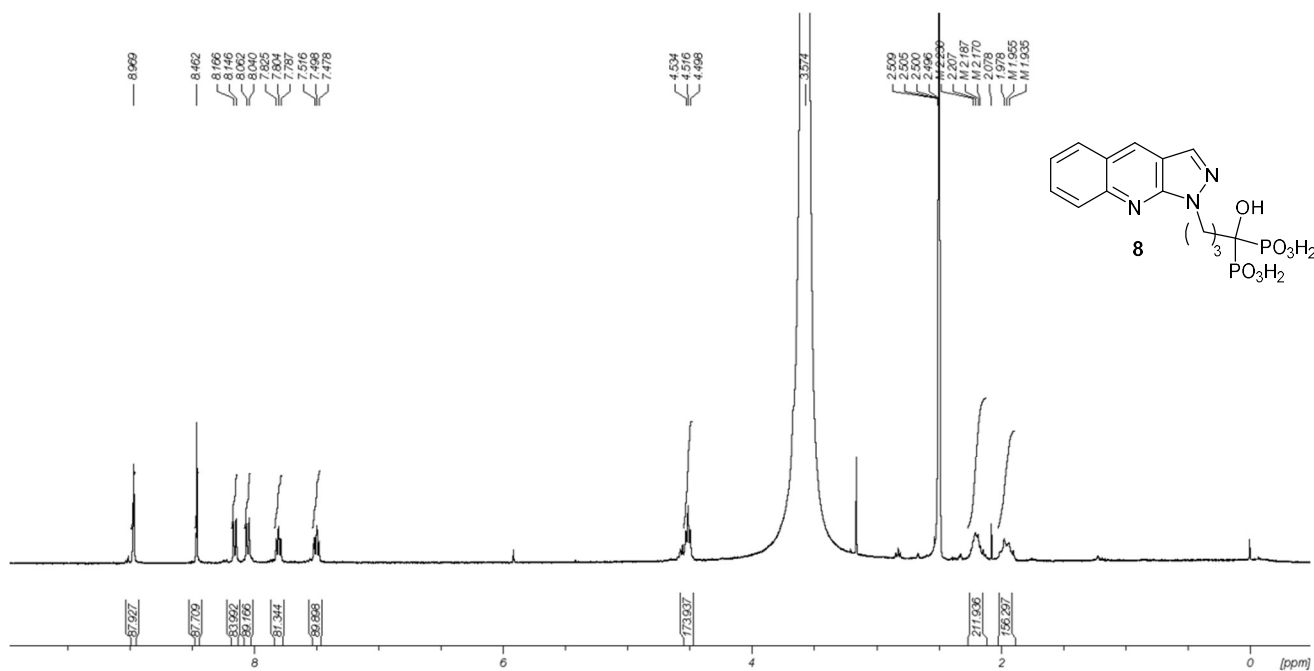

**Figure S24.**  $^1\text{H}$  NMR spectrum (400 MHz,  $\text{DMSO-}d_6$ ) of compound **8**.

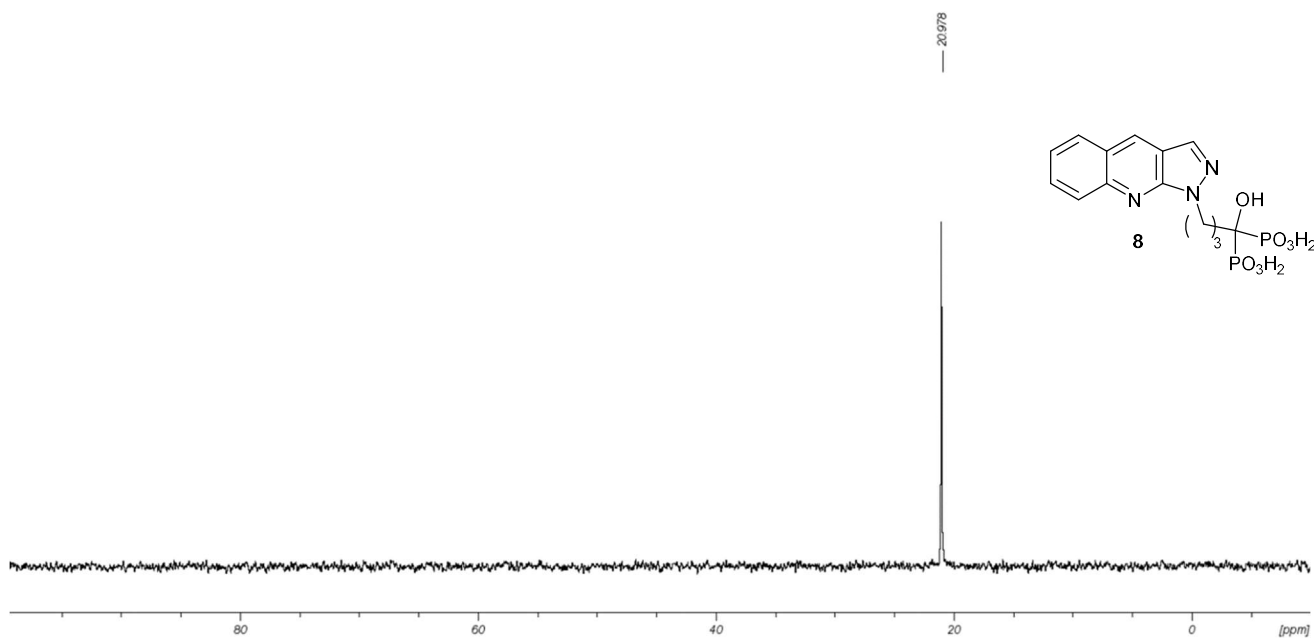

**Figure S25.**  $^{31}\text{P}$  NMR spectrum (121 MHz,  $\text{DMSO-}d_6$ ) of compound **8**.



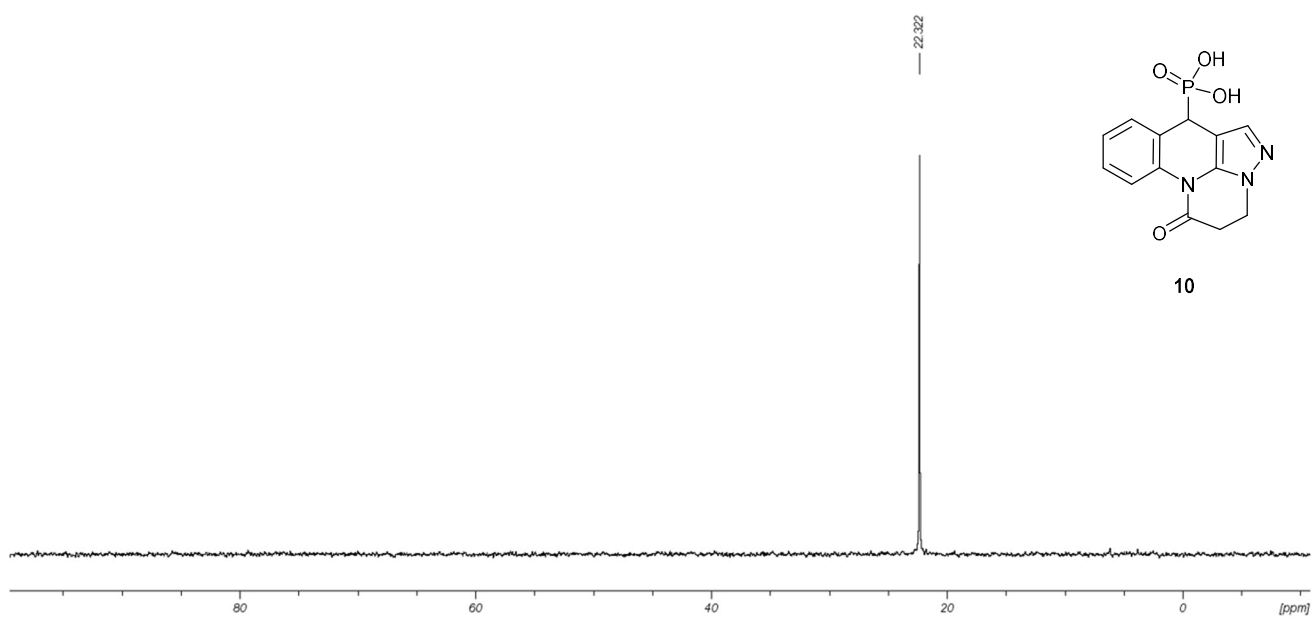

Figure S28.  $^{31}\text{P}$  NMR spectrum (121 MHz,  $\text{DMSO-}d_6$ ) of compound 10.

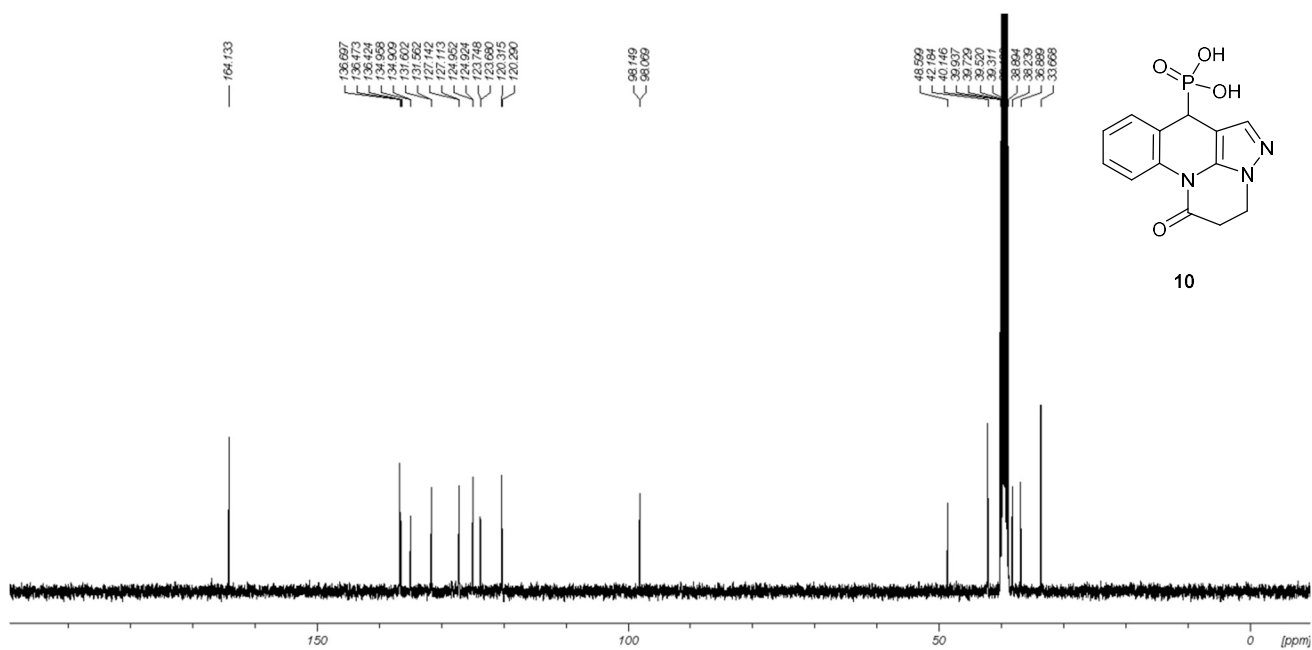

Figure S29.  $^{13}\text{C}$  NMR spectrum (100 MHz,  $\text{DMSO-}d_6$ ) of compound 10.



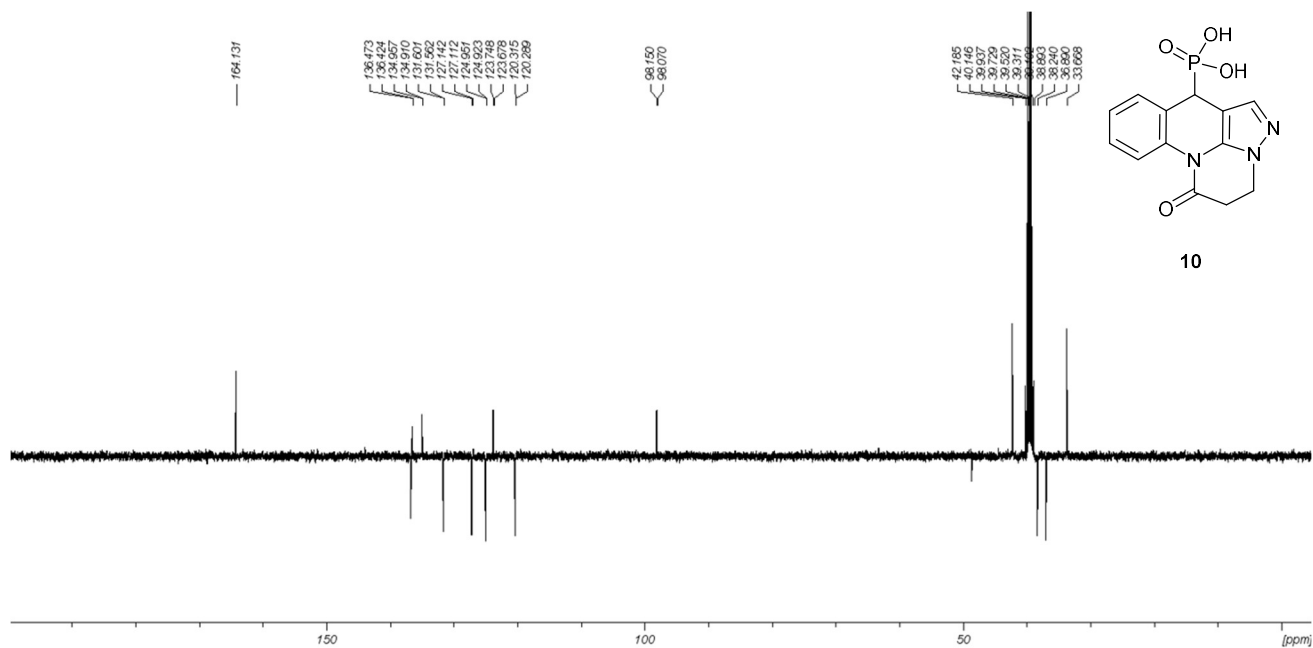

**Figure S30.** APT NMR spectrum (100 MHz, DMSO- $d_6$ ) of compound **10**.

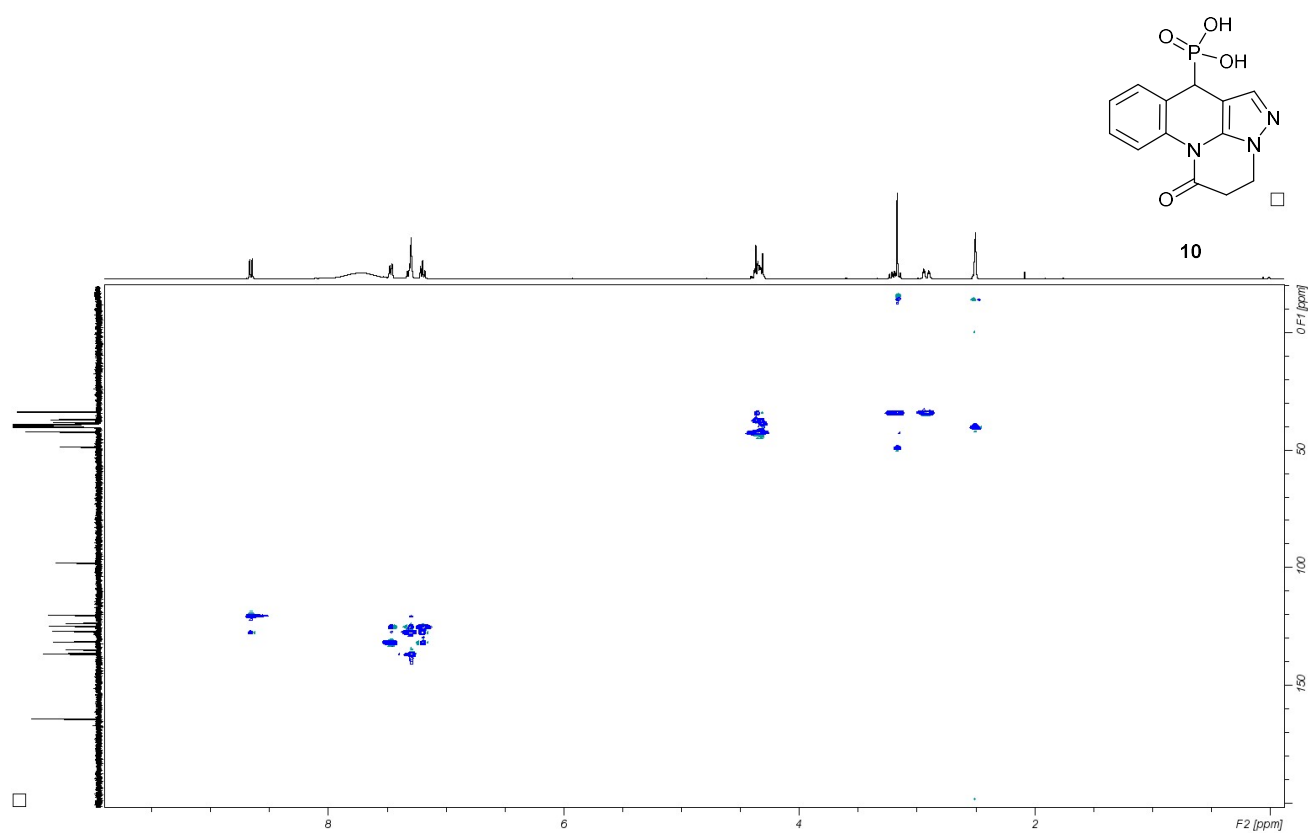

**Figure S31.** HSQC NMR spectrum of compound **10**.

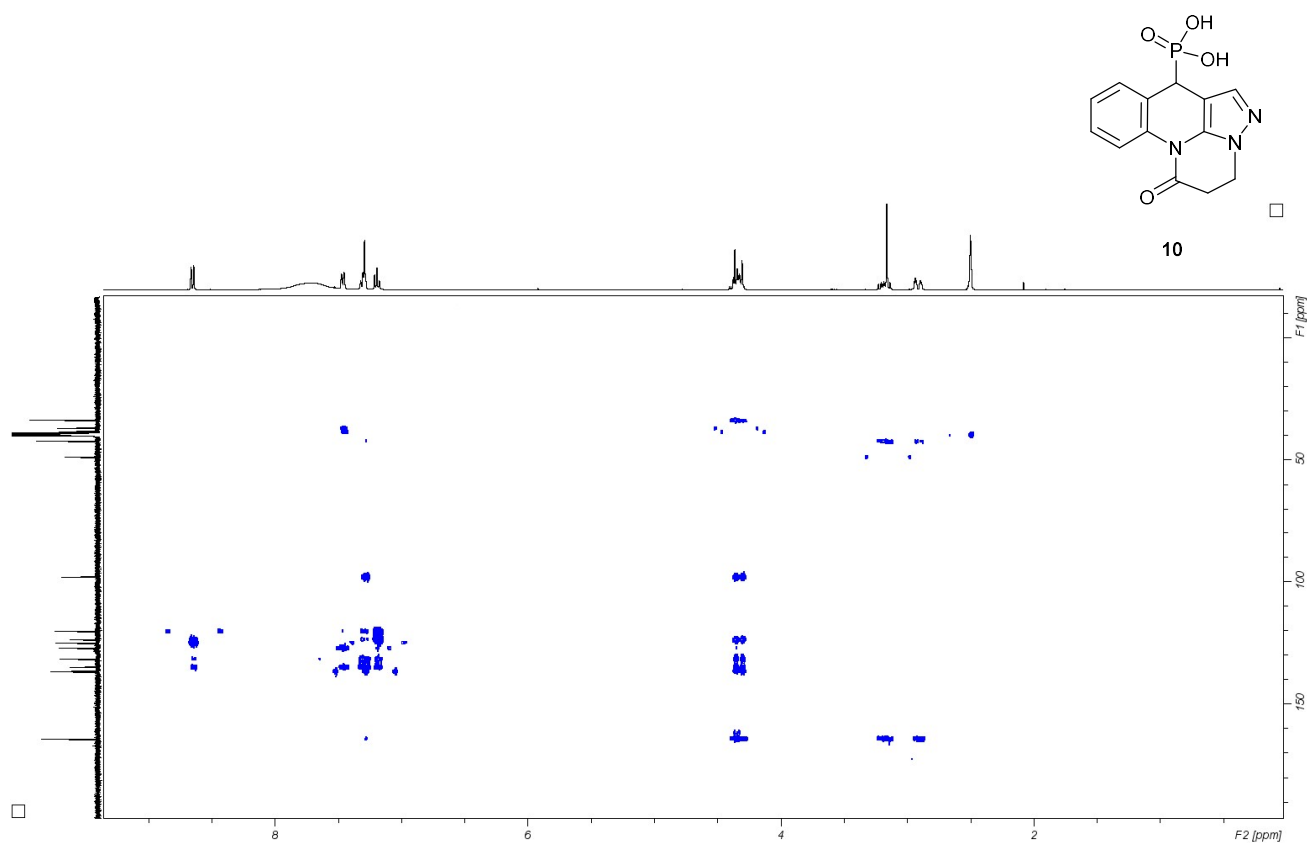

Figure S32. HMBC NMR spectrum of compound 10.

**NMR spectra of diethyl (1-oxo-2,3-dihydro-1H,6H-3a,4,10b-triazaacephenanthrylen-6-yl)phosphonate (11)**

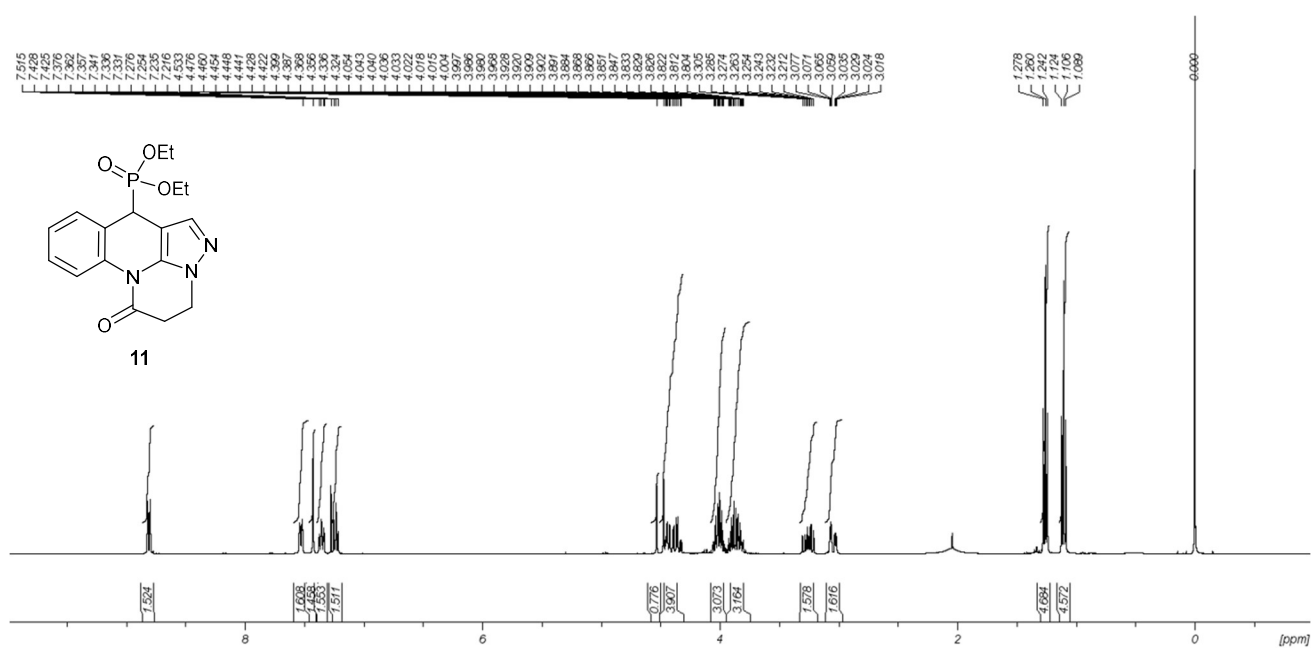

Figure S33.  $^1\text{H}$  NMR spectrum (400 MHz,  $\text{CDCl}_3$ ) of compound 11.

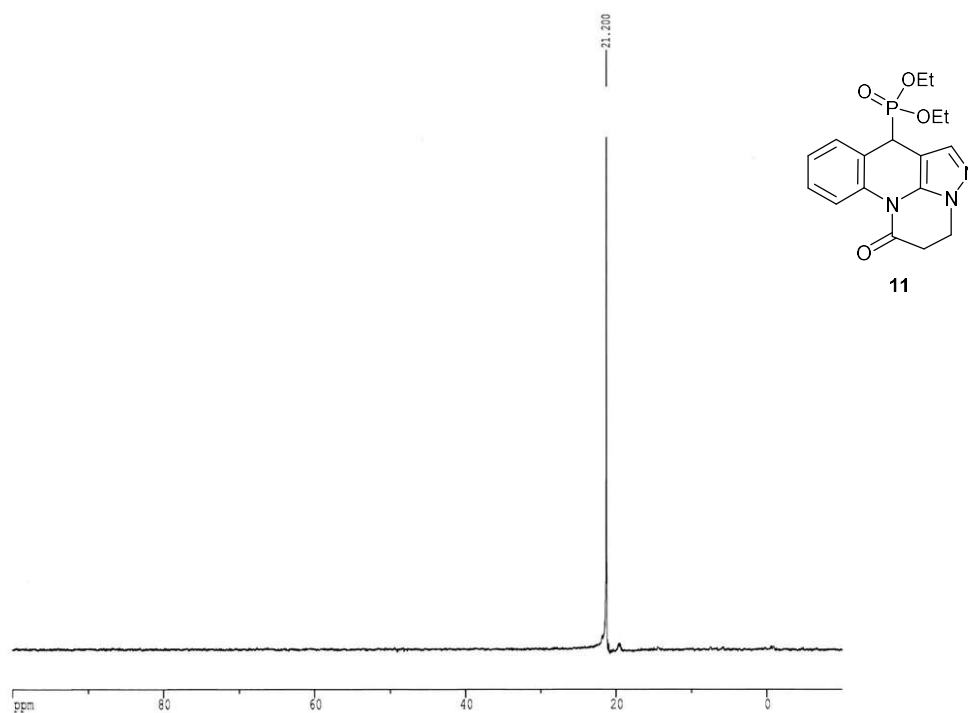

**Figure S34.** <sup>31</sup>P NMR spectrum (121 MHz, CDCl<sub>3</sub>) of compound **11**.

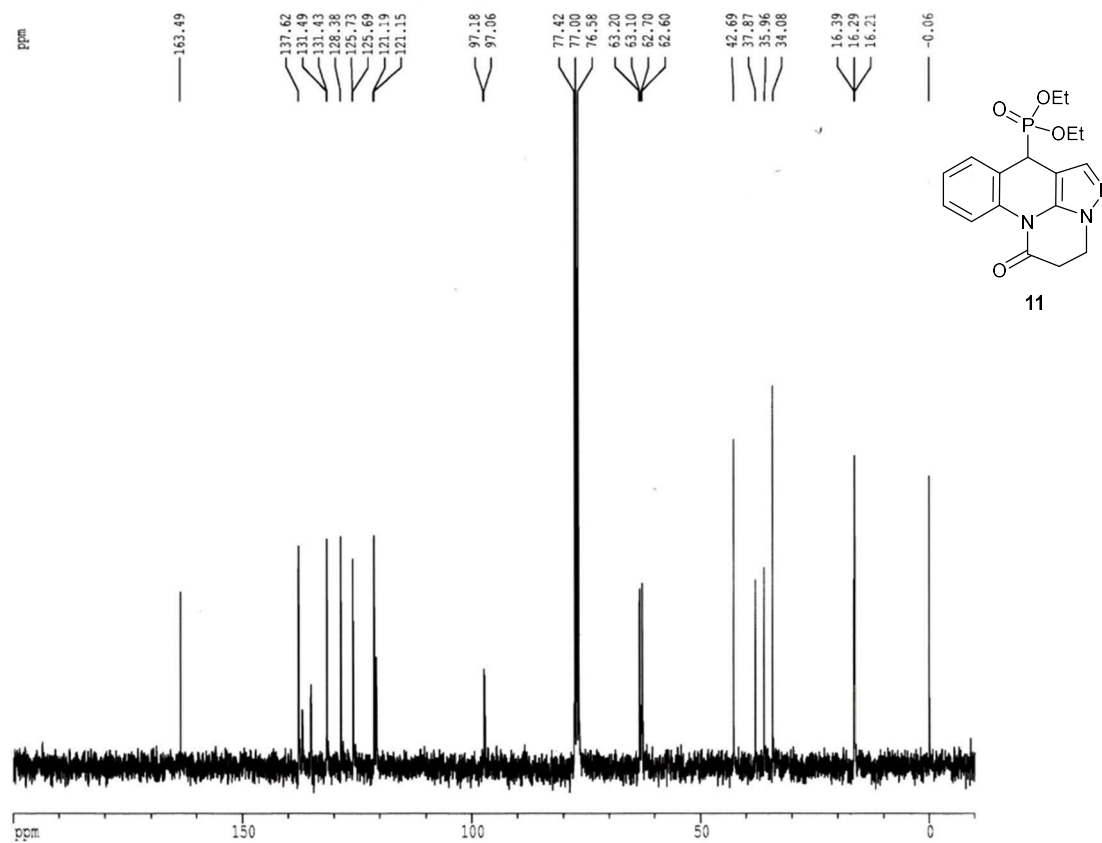

**Figure S35.** <sup>13</sup>C NMR spectrum (75 MHz, CDCl<sub>3</sub>) of compound **11**.

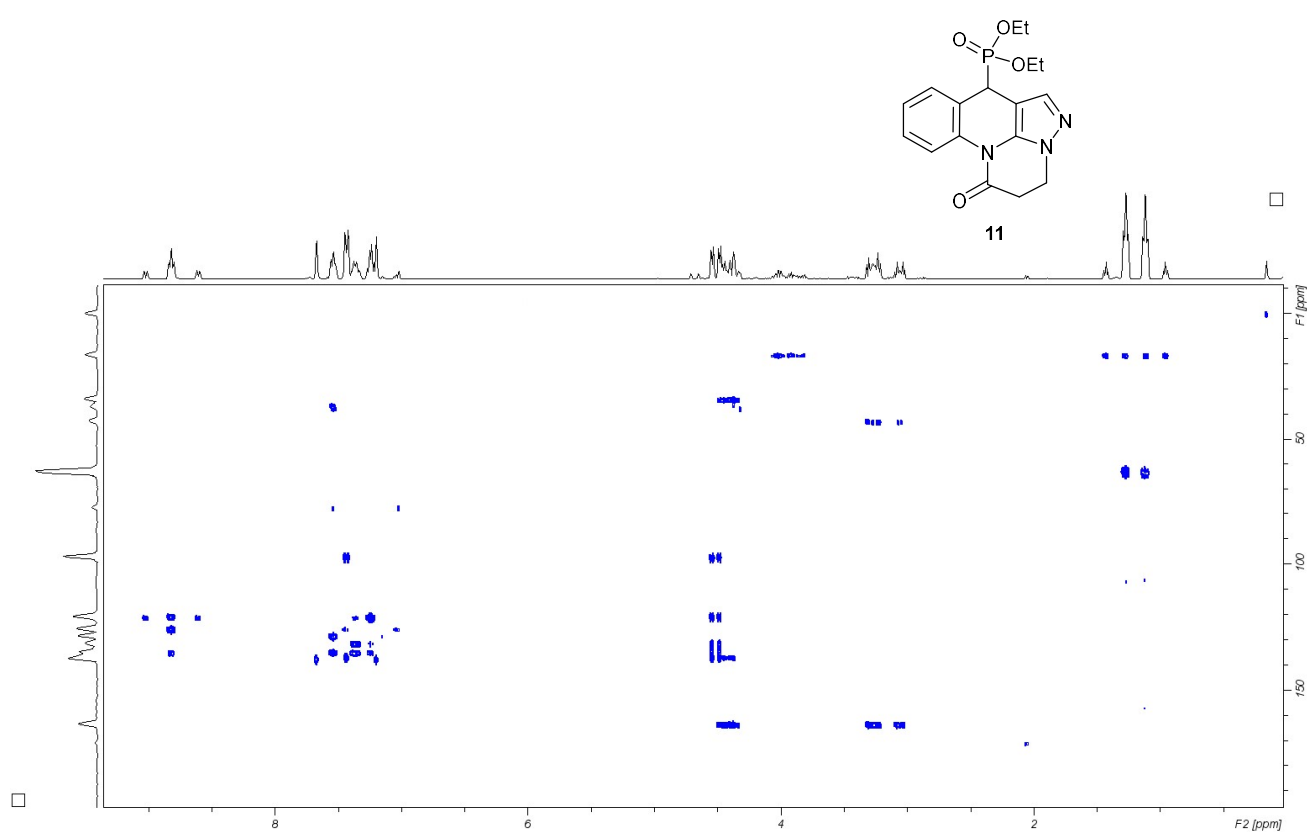

**Figure S36.** HMBC NMR spectrum of compound **11**.

## 2. CheckCIF/PLATON report for compound 11-I

Structure factors have been supplied for datablock(s) 1

THIS REPORT IS FOR GUIDANCE ONLY. IF USED AS PART OF A REVIEW PROCEDURE FOR PUBLICATION, IT SHOULD NOT REPLACE THE EXPERTISE OF AN EXPERIENCED CRYSTALLOGRAPHIC REFEREE.

No syntax errors found.      CIF dictionary      Interpreting this report

### Datablock: 1

---

|                 |                 |                                |
|-----------------|-----------------|--------------------------------|
| Bond precision: | C-C = 0.0044 Å  | Wavelength=0.71073             |
| Cell:           | a=7.8318(10)    | b=10.2797(13)      c=21.689(3) |
|                 | alpha=90        | beta=98.470(6)      gamma=90   |
| Temperature:    | 296 K           |                                |
|                 | Calculated      | Reported                       |
| Volume          | 1727.1(4)       | 1727.1(4)                      |
| Space group     | P 21/n          | P 21/n                         |
| Hall group      | -P 2yn          | -P 2yn                         |
| Moiety formula  | C17 H20 N3 O4 P | ?                              |
| Sum formula     | C17 H20 N3 O4 P | C17 H20 N3 O4 P                |
| Mr              | 361.33          | 361.33                         |
| Dx,g cm-3       | 1.390           | 1.390                          |
| Z               | 4               | 4                              |
| Mu (mm-1)       | 0.187           | 0.187                          |
| F000            | 760.0           | 760.0                          |
| F000'           | 760.74          |                                |
| h,k,lmax        | 10,14,30        | 10,14,30                       |
| Nref            | 4856            | 4838                           |
| Tmin,Tmax       | 0.987,0.989     | 0.968,0.977                    |
| Tmin'           | 0.976           |                                |

Correction method= # Reported T Limits: Tmin=0.968 Tmax=0.977  
AbsCorr = MULTI-SCAN

Data completeness= 0.996      Theta(max)= 29.605

R(reflections)= 0.0825( 3362)      wR2(reflections)= 0.2458( 4838)

S = 1.040      Npar= 226

---

The following ALERTS were generated. Each ALERT has the format  
**test-name\_ALERT\_alert-type\_alert-level.**  
Click on the hyperlinks for more details of the test.

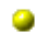

### Alert level C

|                   |                       |                        |       |                         |         |        |
|-------------------|-----------------------|------------------------|-------|-------------------------|---------|--------|
| PLAT220_ALERT_2_C | NonSolvent            | Resd 1                 | C     | Ueq(max)/Ueq(min) Range | 3.1     | Ratio  |
| PLAT340_ALERT_3_C | Low Bond Precision on | C-C Bonds              | ..... |                         | 0.00436 | Ang.   |
| PLAT360_ALERT_2_C | Short                 | C(sp3)-C(sp3) Bond     | C15   | - C16                   | 1.43    | Ang.   |
| PLAT911_ALERT_3_C | Missing FCF Refl      | Between Thmin & STh/L= | 0.600 |                         | 2       | Report |

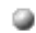

### Alert level G

|                   |                                |                              |                  |        |        |
|-------------------|--------------------------------|------------------------------|------------------|--------|--------|
| PLAT793_ALERT_4_G | Model has Chirality at C4      | (Centro SPGR)                |                  | R      | Verify |
| PLAT883_ALERT_1_G | No Info/Value for              | _atom_sites_solution_primary | .                | Please | Do !   |
| PLAT910_ALERT_3_G | Missing # of FCF Reflection(s) | Below Theta(Min).            |                  | 3      | Note   |
| PLAT912_ALERT_4_G | Missing # of FCF Reflections   | Above STh/L=                 | 0.600            | 14     | Note   |
| PLAT933_ALERT_2_G | Number of OMIT Records in      | Embedded .res File           | ...              | 4      | Note   |
| PLAT978_ALERT_2_G | Number C-C Bonds with          | Positive Residual Density.   |                  | 1      | Info   |
| PLAT992_ALERT_5_G | Repd & Actual                  | _reflns_number_gt            | Values Differ by | 3      | Check  |

0 **ALERT level A** = Most likely a serious problem - resolve or explain  
0 **ALERT level B** = A potentially serious problem, consider carefully  
4 **ALERT level C** = Check. Ensure it is not caused by an omission or oversight  
7 **ALERT level G** = General information/check it is not something unexpected

1 ALERT type 1 CIF construction/syntax error, inconsistent or missing data  
4 ALERT type 2 Indicator that the structure model may be wrong or deficient  
3 ALERT type 3 Indicator that the structure quality may be low  
2 ALERT type 4 Improvement, methodology, query or suggestion  
1 ALERT type 5 Informative message, check

It is advisable to attempt to resolve as many as possible of the alerts in all categories. Often the minor alerts point to easily fixed oversights, errors and omissions in your CIF or refinement strategy, so attention to these fine details can be worthwhile. In order to resolve some of the more serious problems it may be necessary to carry out additional measurements or structure refinements. However, the purpose of your study may justify the reported deviations and the more serious of these should normally be commented upon in the discussion or experimental section of a paper or in the "special\_details" fields of the CIF. checkCIF was carefully designed to identify outliers and unusual parameters, but every test has its limitations and alerts that are not important in a particular case may appear. Conversely, the absence of alerts does not guarantee there are no aspects of the results needing attention. It is up to the individual to critically assess their own results and, if necessary, seek expert advice.

### Publication of your CIF in IUCr journals

A basic structural check has been run on your CIF. These basic checks will be run on all CIFs submitted for publication in IUCr journals (*Acta Crystallographica*, *Journal of Applied Crystallography*, *Journal of Synchrotron Radiation*); however, if you intend to submit to *Acta Crystallographica Section C* or *E* or *IUCrData*, you should make sure that full publication checks are run on the final version of your CIF prior to submission.

### Publication of your CIF in other journals

Please refer to the *Notes for Authors* of the relevant journal for any special instructions relating to CIF submission.

Datablock 1 - ellipsoid plot

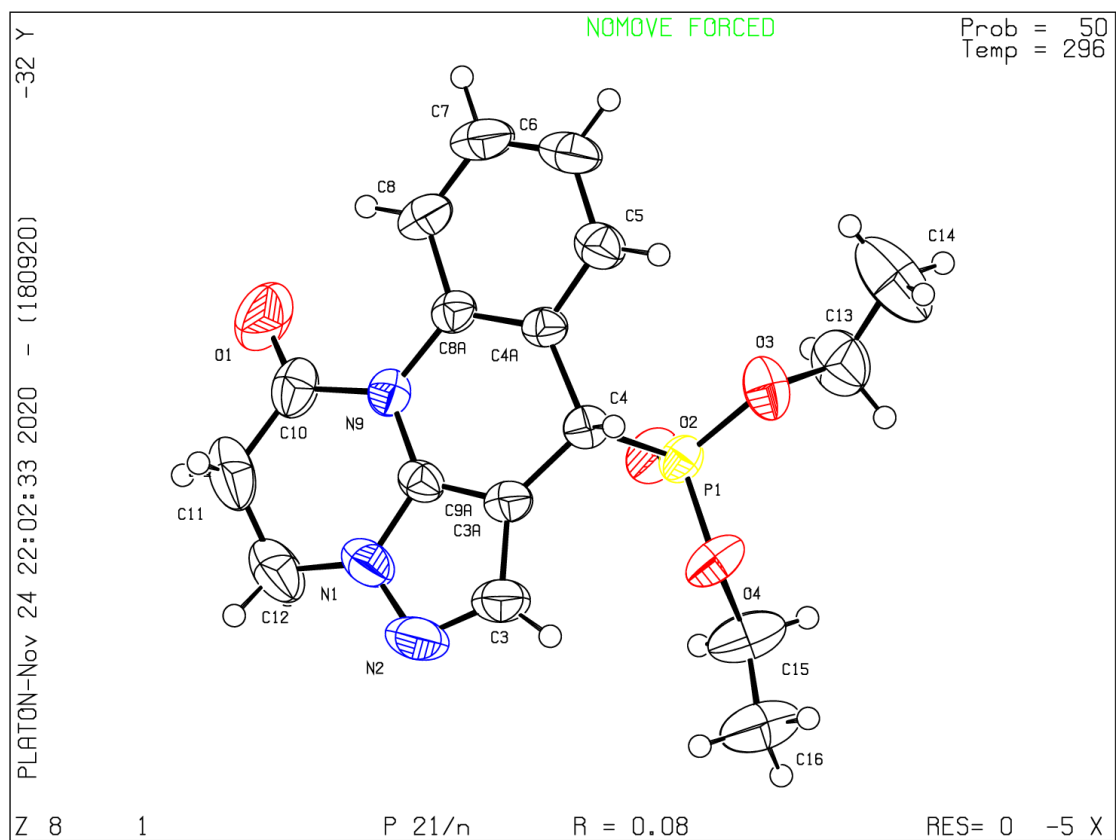

### 3. CheckCIF/PLATON report for compound 11-II

Structure factors have been supplied for datablock(s) 2

THIS REPORT IS FOR GUIDANCE ONLY. IF USED AS PART OF A REVIEW PROCEDURE FOR PUBLICATION, IT SHOULD NOT REPLACE THE EXPERTISE OF AN EXPERIENCED CRYSTALLOGRAPHIC REFEREE.

No syntax errors found.      CIF dictionary      Interpreting this report

#### Datablock: 2

---

|                 |                 |                               |
|-----------------|-----------------|-------------------------------|
| Bond precision: | C-C = 0.0067 Å  | Wavelength=0.71073            |
| Cell:           | a=11.592(3)     | b=7.7150(15)      c=19.848(5) |
|                 | alpha=90        | beta=105.237(7)      gamma=90 |
| Temperature:    | 296 K           |                               |
|                 | Calculated      | Reported                      |
| Volume          | 1712.7(7)       | 1712.7(7)                     |
| Space group     | P 21/n          | P 21/n                        |
| Hall group      | -P 2yn          | -P 2yn                        |
| Moiety formula  | C17 H20 N3 O4 P | ?                             |
| Sum formula     | C17 H20 N3 O4 P | C17 H20 N3 O4 P               |
| Mr              | 361.33          | 361.33                        |
| Dx,g cm-3       | 1.401           | 1.401                         |
| Z               | 4               | 4                             |
| Mu (mm-1)       | 0.188           | 0.188                         |
| F000            | 760.0           | 760.0                         |
| F000'           | 760.74          |                               |
| h,k,lmax        | 13,9,23         | 13,9,23                       |
| Nref            | 3142            | 3108                          |
| Tmin,Tmax       | 0.989,0.993     | 0.989,0.993                   |
| Tmin'           | 0.972           |                               |

Correction method= # Reported T Limits: Tmin=0.989 Tmax=0.993  
AbsCorr = MULTI-SCAN

Data completeness= 0.989      Theta(max)= 25.361

R(reflections)= 0.0817( 1786)      wR2(reflections)= 0.2347( 3108)

S = 0.960      Npar= 227

---

The following ALERTS were generated. Each ALERT has the format  
**test-name\_ALERT\_alert-type\_alert-level.**  
Click on the hyperlinks for more details of the test.



---

**● Alert level C**  
 PLAT340\_ALERT\_3\_C Low Bond Precision on C-C Bonds ..... 0.00671 Ang.  
 PLAT911\_ALERT\_3\_C Missing FCF Refl Between Thmin & STh/L= 0.600 15 Report

---

**● Alert level G**  
 PLAT066\_ALERT\_1\_G Predicted and Reported Tmin&Tmax Range Identical ? Check  
 PLAT793\_ALERT\_4\_G Model has Chirality at C4 (Centro SPGR) R Verify  
 PLAT883\_ALERT\_1\_G No Info/Value for \_atom\_sites\_solution\_primary . Please Do !  
 PLAT910\_ALERT\_3\_G Missing # of FCF Reflection(s) Below Theta(Min). 3 Note  
 PLAT912\_ALERT\_4\_G Missing # of FCF Reflections Above STh/L= 0.600 17 Note  
 PLAT933\_ALERT\_2\_G Number of OMIT Records in Embedded .res File ... 12 Note  
 PLAT941\_ALERT\_3\_G Average HKL Measurement Multiplicity ..... 2.7 Low  
 PLAT978\_ALERT\_2\_G Number C-C Bonds with Positive Residual Density. 0 Info

---

0 **ALERT level A** = Most likely a serious problem - resolve or explain  
 0 **ALERT level B** = A potentially serious problem, consider carefully  
 2 **ALERT level C** = Check. Ensure it is not caused by an omission or oversight  
 8 **ALERT level G** = General information/check it is not something unexpected

2 ALERT type 1 CIF construction/syntax error, inconsistent or missing data  
 2 ALERT type 2 Indicator that the structure model may be wrong or deficient  
 4 ALERT type 3 Indicator that the structure quality may be low  
 2 ALERT type 4 Improvement, methodology, query or suggestion  
 0 ALERT type 5 Informative message, check

---

It is advisable to attempt to resolve as many as possible of the alerts in all categories. Often the minor alerts point to easily fixed oversights, errors and omissions in your CIF or refinement strategy, so attention to these fine details can be worthwhile. In order to resolve some of the more serious problems it may be necessary to carry out additional measurements or structure refinements. However, the purpose of your study may justify the reported deviations and the more serious of these should normally be commented upon in the discussion or experimental section of a paper or in the "special\_details" fields of the CIF. checkCIF was carefully designed to identify outliers and unusual parameters, but every test has its limitations and alerts that are not important in a particular case may appear. Conversely, the absence of alerts does not guarantee there are no aspects of the results needing attention. It is up to the individual to critically assess their own results and, if necessary, seek expert advice.

### Publication of your CIF in IUCr journals

A basic structural check has been run on your CIF. These basic checks will be run on all CIFs submitted for publication in IUCr journals (*Acta Crystallographica*, *Journal of Applied Crystallography*, *Journal of Synchrotron Radiation*); however, if you intend to submit to *Acta Crystallographica Section C* or *E* or *IUCrData*, you should make sure that full publication checks are run on the final version of your CIF prior to submission.

### Publication of your CIF in other journals

Please refer to the *Notes for Authors* of the relevant journal for any special instructions relating to CIF submission.

Datablock 2 - ellipsoid plot

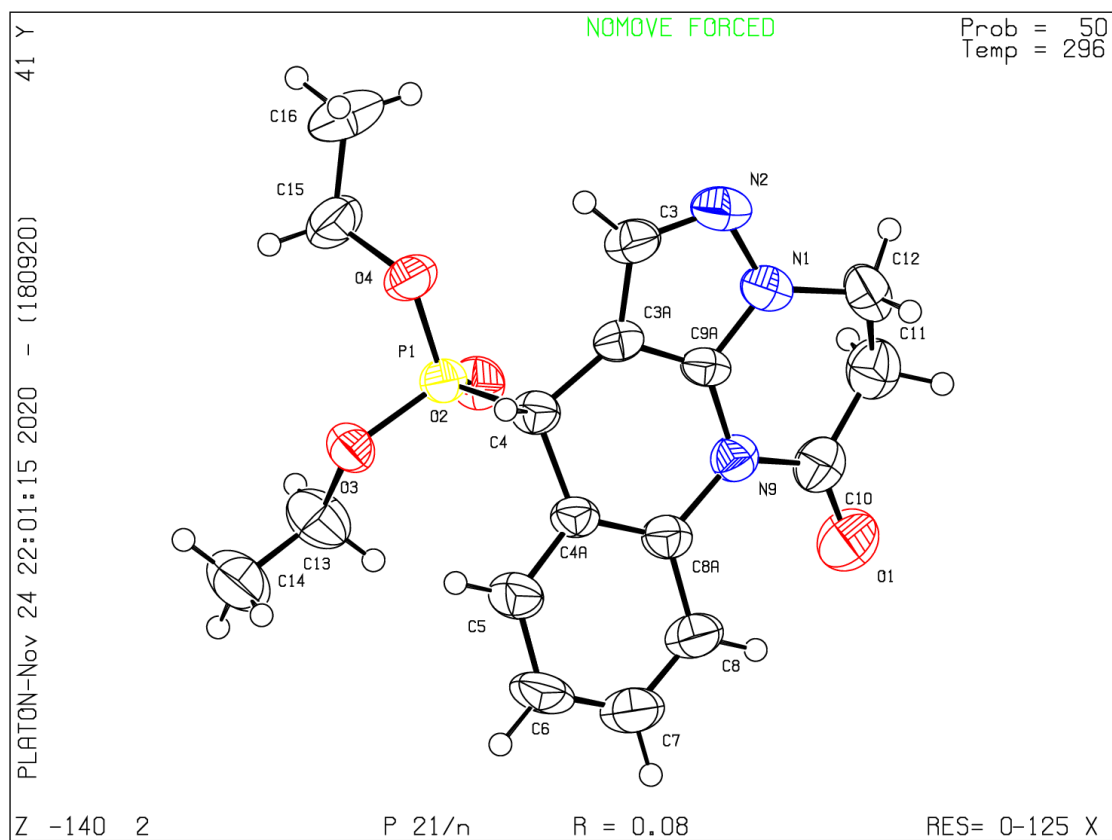

Supplement: d1ob00025j1.pdf [file d1ob00025j1.pdf]
